# Supplementary material
Source: publisher figshare collection journal article supplement (https://tandf.figshare.com/articles/dataset/_/5439787)
Supplement: Supplementary file 1 [file 1]

## Supplement A: Genotype Data Used to Evaluate Kokanee and Sockeye Salmon Collections

Supplementary Table S.A.1. Genotype data from 13 microsatellite loci used to evaluate genetic divergence and diversity in three Kokanee collections and 12 Sockeye Salmon collections obtained within or near the Katmai National Park and Preserve, southwestern Alaska. The genotype data are formatted for use in the computer program FSTAT. Loci are presented in the following order: *Omy77*, *One100*, *One102*, *One103*, *One105*, *One108*, *One110*, *One111*, *One114*, *One115*, *Ots103*, *Ots107*, and *uSat60*. Collection labels used below are as follows: for Sockeye Salmon, 1 = Charlene Creek (collection S1), 2 = Dumpling Creek 1 (S2), 3 = Dumpling Creek 3 (S3), 4 = East La Gorce Creek (S4), 5 = Hammersly Lake (S5), 6 = Idavain Creek (S6), 7 = Katolinat Creek 4 (S7), 8 = Lower Q-Tip Lake (S8), 9 = North La Gorce Creek (S9), 10 = Swikshak River (S10), 11 = Karluk River (S11), and 12 = Surprise Lake (S12); for kokanee, 13 = Dakavak Lake (DAK), 14 = Devil's Cove Lake (DEV), and 15 = Jo-Jo Lake (JOJ).

### FSTAT Input File:

```
15 13 394 3
Omy77_1
One100_1
One102_1
One103-PT_1
One105_1
One108_1
One110_1
One111_1
One114_1
One115_1
Ots103_1
Ots107_1
uSat60_1
1 100104 324324 231235 274286 128132 204212 242262 206242 243271 205205 153177
110114 116116
1 100104 336336 231235 274314 128128 184184 246262 202270 259291 197201 161177
114114 116128
1 100104 324336 207231 262314 128128 184196 254258 202238 291291 177201 181201
114114 116116
1 100104 352388 207231 286314 128128 184196 254258 198266 271291 201233 201201
114114 116116
1 100104 348388 207239 282294 128128 192224 246262 202214 243267 201201 177181
114114 116128
```

1 100100 340348 207231 294314 128132 196224 242246 202242 243291 197205 157189  
114114 116128  
1 100104 262324 207231 274286 128128 192208 246262 202206 243271 205205 153201  
110114 116128  
1 100104 336388 207231 274286 128128 188192 246266 202206 259263 201233 181201  
114114 116116  
1 100104 332336 207235 274274 128132 192212 246250 202238 255259 205217 185189  
114114 116116  
1 100104 308336 207231 262298 128128 192212 250262 210242 271291 189205 197197  
114114 116128  
1 100100 312336 227235 286314 128128 184224 254258 202282 255291 197201 133205  
114118 128128  
1 100104 324336 207227 294322 128128 192224 246262 202202 239291 205233 197201  
114114 116128  
1 104106 324324 207207 250262 128128 192224 242246 202270 243271 177177 161201  
114114 116128  
1 104104 324324 207231 262346 128132 192212 242246 202242 255271 177205 161177  
110114 116128  
1 100100 336348 207211 290342 128128 188196 258266 286286 243259 205205 161197  
114114 116116  
1 100100 262324 231235 262274 128128 204208 246262 202202 243271 205205 161201  
110114 116116  
1 104104 262388 207231 0 128132 192212 242246 202206 243271 201205 153177  
114114 116128  
1 100104 266388 207231 282286 128132 184200 266270 198206 243251 189225 177205  
114122 116116  
1 100100 340348 207227 274290 128128 192212 254270 202206 235263 193209 189193  
114114 120120  
1 100100 348388 207235 282294 128132 192224 246262 202214 243267 201205 157181  
114114 128128  
1 100100 336388 207231 294294 128132 188192 242270 202202 239259 201205 181201  
114114 116128  
1 100104 348388 207235 282294 128132 192224 246262 202214 243267 201205 157181  
114114 116128  
1 100104 316336 207243 314330 128132 212212 254262 278306 255263 197209 157169  
114114 116116  
1 100104 336388 207207 262274 128132 196212 242258 202238 255291 201205 161201  
114114 116128  
1 100104 360388 207223 262290 128128 192224 254270 202286 271291 177233 153161  
114114 116128  
1 100106 332336 227231 262346 128128 188192 254266 230262 275291 205205 161161  
114114 116116  
1 104104 328344 207207 178306 136136 192196 254266 210290 227259 201217 161181  
114114 116116  
1 104104 324336 231231 274286 128128 184184 254262 242266 291291 177201 161201  
114114 116116

1 104106 324352 231231 250262 128132 184184 246254 202270 243259 201233 161181  
114114 116128  
1 104106 324352 207207 250262 128132 184224 242246 206270 243271 201233 161201  
114114 116128  
1 100104 324336 207231 274286 128128 184196 254258 238266 243271 177201 201201  
114114 116116  
1 104104 324388 207231 250262 128128 192192 246262 242270 271291 201201 161181  
114114 116116  
1 104104 336348 207239 282294 128128 192224 246250 202214 243267 201201 177181  
114114 116116  
1 104104 336340 207231 286294 128128 188192 242242 202206 263291 201233 161177  
114114 116116  
1 104104 324336 207227 286306 128128 188188 250286 210282 259291 205205 177181  
110114 116128  
1 100100 336352 207231 294310 128132 188212 246258 202206 291291 193201 177201  
114114 116116  
1 104104 336352 207239 274286 124128 196208 254258 238262 263271 177201 157181  
114114 128128  
1 100100 336340 231231 286294 128132 188192 242242 202206 239291 197233 177177  
114114 128128  
1 104104 388388 207231 262274 128132 196208 246258 202238 239243 197201 161177  
110114 116128  
1 100104 336364 207231 270274 128128 188188 246258 202206 259287 177201 181193  
110114 116116  
1 100100 316332 207251 274302 128128 192192 246254 198206 231247 205221 181197  
114114 116128  
1 100104 336388 207239 282290 128132 192192 250266 214286 259271 205233 177185  
114114 116128  
1 104104 352384 207231 262334 128132 192208 258258 230242 243291 193217 153161  
114114 116128  
1 104104 352384 207207 302334 128132 192192 262266 198230 243291 193201 153197  
114114 116128  
1 100100 348352 207235 294314 128132 196224 246254 202242 243291 197205 157189  
114114 116128  
1 104104 324336 207235 298322 128128 192224 246250 202210 239239 197205 181201  
114114 116116  
1 104106 336388 207207 334346 128128 184192 246262 230242 271291 201201 161197  
114114 116128  
1 100104 332360 235243 286346 128128 192192 246262 198206 291291 189213 189197  
114114 116116  
1 104106 336388 207231 250262 128132 192208 246258 242270 271291 177201 161181  
114114 116128  
1 100100 352388 207231 282286 128132 196200 254266 198206 251287 189201 177189  
114114 116128  
1 100104 340360 207235 286294 128132 184196 242254 202270 267291 197205 161189  
114114 116116

1 104104 324336 207231 250334 128128 184192 246262 230270 271291 201201 161181  
114114 116116  
1 100104 324336 207207 274290 128128 192208 246270 206286 255255 205217 185189  
114114 116116  
1 104106 324388 207231 262314 128128 184196 254258 198202 271291 177201 181201  
114114 128128  
1 104104 348352 231235 278286 128128 196224 246254 206270 243243 197205 161189  
114114 116116  
1 100104 344348 211239 310322 128128 196204 238242 202202 235239 205205 157209  
114114 116128  
1 100104 332336 207207 274274 128128 192208 246270 202238 243271 205205 161189  
114114 116116  
1 104104 336364 207235 294294 128128 192224 246250 202202 235291 197205 181201  
114114 116116  
1 100104 352388 207231 290318 128128 196200 242254 202246 251287 189201 177205  
114114 116116  
1 100104 336340 207231 294294 128132 192192 242262 202202 259263 197233 161177  
114114 116128  
1 100104 352360 231235 286294 128128 196224 242246 202270 267291 197205 157189  
114114 116128  
1 104106 324388 207231 250286 128132 184192 246254 266270 243243 177201 161181  
114114 116128  
1 100100 266388 207231 282286 128132 184212 242270 198206 251287 225233 177189  
114122 116128  
1 100104 336352 207207 262274 128128 184196 254258 202238 243271 201233 201201  
114114 116116  
2 100100 304356 239239 266298 128132 196200 254286 202202 231231 193217 193209  
114118 116128  
2 104114 336348 207243 258294 128128 192204 266266 210282 235259 185217 165165  
114114 116128  
2 100106 336336 243251 294302 128136 216224 258266 202206 235255 213225 157181  
114118 116116  
2 104104 328344 223251 314334 128128 192212 242258 210246 255267 193225 157193  
114118 116116  
2 100104 328336 235239 298302 128136 200212 254262 202214 235239 197213 177197  
114114 116116  
2 104114 336348 235247 294310 128128 204224 234266 202210 235259 205217 161165  
114114 128128  
2 100100 324340 239255 286302 128128 188196 230258 214214 243263 189205 177193  
114118 116116  
2 100104 284336 207223 258314 128128 188196 242276 202302 259275 201205 169181  
114114 116128  
2 100106 340352 235235 286306 128136 192208 246250 206286 235263 229229 173189  
114126 116128  
2 100104 348352 211251 310334 128132 200212 246262 206298 219243 193205 177209  
114114 116128

2 100104 320336 207235 290294 128128 196212 246262 194242 223227 193217 193201  
114114 116128  
2 100104 324372 211227 266322 128128 212212 238250 202206 239259 185201 157189  
114114 116116  
2 100100 312356 231263 270322 128128 196204 230254 198202 267275 201205 157173  
114114 116116  
2 104104 312336 231251 290294 128128 188208 234254 214242 219271 193221 173173  
114118 116128  
2 104104 340352 235251 290334 128132 208224 234262 206242 231235 193217 161197  
114118 128128  
2 104104 312344 239239 294302 128128 192208 230234 202214 243267 189221 173205  
114118 128128  
2 100102 336344 207259 282298 128136 192212 258258 270290 239243 189217 201205  
114114 114116  
2 100102 352352 207251 0 128128 196208 254262 202274 251279 177213 157185  
114114 116128  
2 100104 348352 211251 310334 128132 200212 246262 206298 243259 193205 177209  
118126 116116  
2 102104 344352 207207 282326 128132 188192 226262 214270 243243 201209 173201  
114114 116128  
2 100104 312336 239243 310334 128128 208232 234250 202206 235243 193209 161201  
114118 116116  
2 100100 344352 231239 274302 128128 188196 258262 198202 231251 185209 201205  
118118 116116  
2 100100 316340 251263 290290 128128 184220 246250 258290 231267 177181 173173  
114114 116116  
2 104104 324324 231235 258294 128128 196204 254262 246282 247263 201205 157157  
114122 128128  
2 100104 312336 211243 290290 128132 196196 250262 242290 227227 185193 173177  
114114 116116  
2 100104 324348 235243 258290 128136 212212 230246 206242 223263 217217 181193  
114114 116128  
2 104104 336372 207251 282310 128128 188208 250258 0 259279 185189 157177  
114114 120128  
2 100100 328336 243251 258314 128128 196216 242266 246282 263263 185193 157197  
114114 128128  
2 104104 312336 207243 310334 128128 216232 242258 202206 235243 205209 161201  
114114 116116  
2 100104 312320 251255 0 128128 192196 250262 290290 243267 189197 157193  
118118 116116  
2 100102 320352 211231 294310 128128 192212 230254 198306 231235 205217 173201  
114114 116116  
2 100104 336372 211211 306314 128128 192196 250254 202202 247247 177213 181193  
114114 114116  
2 100104 328336 235243 258302 128128 196216 242266 258282 263267 193205 161197  
114114 116128

2 100104 360364 207207 274314 128132 200204 226270 210210 243259 217217 157169  
114114 116128  
2 100104 312332 211243 278302 128128 200208 246246 202278 259267 189209 193205  
114114 116128  
2 104106 312348 231235 282302 128132 192208 250262 202242 231243 205209 173197  
114114 128128  
2 100104 344344 203231 0 128136 192192 250258 202210 251279 213217 189189  
114118 116130  
2 104114 336360 235247 0 128132 204224 234266 202286 235251 185217 161165  
114114 116128  
2 100104 312340 243251 274302 128128 188188 258258 246278 235247 209213 173181  
114118 128128  
2 104104 312352 207251 302310 128136 180192 258262 206290 259267 189217 193201  
114118 116128  
2 104104 312336 207211 262294 128128 200212 246246 198214 235263 189209 173209  
114114 128128  
2 100104 312340 207235 294302 128128 212240 246266 202290 231243 189217 193193  
114118 116128  
2 100104 336336 243251 294302 128136 224224 250258 202206 247263 205213 157157  
114114 116116  
2 100104 348352 227227 262306 128136 188192 250276 210290 243275 177181 177181  
114114 116120  
2 100104 336336 207207 0 128136 196228 250262 206290 259267 185193 189201  
110118 116116  
2 100100 336348 207231 282290 128132 196200 262262 194242 235263 189193 157177  
114118 116116  
2 100100 348348 207247 282282 128140 188232 250254 202206 251263 205205 177197  
114114 116128  
2 104104 312332 235239 0 128128 192208 262262 206242 259267 221229 193197  
114114 116128  
2 104104 312336 211243 302302 128128 192224 230258 202202 263267 189213 157193  
114118 116128  
2 100104 312352 231231 262302 132136 180192 250258 198202 227259 185213 157169  
114114 116116  
2 100104 336368 207211 302318 128136 196200 258262 202290 227259 189197 157177  
114114 116116  
2 100106 344356 227231 278334 128128 184224 258266 202294 247255 209225 177201  
110114 116128  
2 102104 324324 243255 294310 128136 196212 226250 198282 247259 189205 157169  
114114 128128  
2 104104 312352 235239 290294 128128 180212 238246 214242 243263 213221 177201  
114114 116118  
2 100104 312336 207235 314322 128128 180184 242262 206290 227279 177185 173177  
114118 116120  
2 100104 312348 211235 0 128128 200212 246258 206206 243263 189209 173177  
114114 116128

2 104104 336344 235239 282334 128128 212212 246246 206278 243247 197209 193193  
114114 116128  
2 100106 312336 231231 262302 128128 180208 254258 198202 227279 185217 161173  
114114 128128  
2 100100 352368 207255 282282 128128 188196 230250 214270 219235 189193 177189  
114114 116128  
2 100104 336340 207231 282314 128136 180196 242258 194226 259279 189213 161173  
114114 116116  
3 100104 312368 235239 286314 128128 188212 254258 202210 251259 197201 161193  
114114 116116  
3 100104 258320 207235 282310 128128 184196 238274 202210 239271 205221 157165  
114114 116128  
3 104104 258348 207207 206266 128128 180204 234254 302326 263283 185213 181185  
114114 128128  
3 100106 340348 207207 306366 128128 180192 246258 194286 287291 205217 181193  
114114 116118  
3 100104 300312 227231 274294 132140 196212 250258 198242 231259 197201 173177  
114114 120128  
3 100104 332348 207223 254282 128128 192204 242276 198214 231263 193205 173177  
114118 116128  
3 100100 316336 207247 290314 128148 192204 242254 202210 255267 209209 157181  
114114 116128  
3 104104 348360 223239 302306 128128 196204 238262 206290 227247 209221 157169  
114114 116128  
3 104104 332340 235235 306310 128128 184192 270270 198210 239291 209233 173181  
080114 116116  
3 100104 352364 211239 306310 128128 204208 254274 202290 227247 201205 149177  
114114 120128  
3 100100 254328 183223 302314 128128 196200 262274 206210 263263 221233 157181  
114114 128128  
3 100104 336356 231231 282302 128136 192212 242258 198202 239243 197213 173205  
114114 120128  
3 100100 348348 203231 294302 128128 196220 270278 218286 259267 221229 153177  
114114 116128  
3 100104 270356 227231 282302 128128 212220 242258 198202 231255 197201 173205  
114114 120128  
3 100100 316324 207243 290298 128132 184212 254258 210282 231239 205209 185193  
114118 116128  
3 100104 254364 223247 298310 128128 204212 250254 206282 235235 217233 169193  
114114 116128  
3 100104 352372 211255 278282 128128 192216 238250 202206 223247 205229 157161  
114114 128128  
3 100100 254340 247247 286298 128128 204212 254262 214282 235291 209233 185185  
114114 128128  
3 100104 340344 207211 254266 128128 188204 242254 202286 235275 197205 157197  
114114 128128

3 100104 254296 231239 298298 128128 184192 234246 266286 247263 201225 181181  
114114 128128  
3 100104 258328 223227 314322 128128 184196 246254 202202 243251 217225 177185  
114118 128128  
3 100100 344364 207251 274314 128128 188196 242250 202202 255263 201213 173185  
114118 116120  
3 100100 304348 239239 298314 128128 188200 266280 194214 239251 201213 157177  
114118 116116  
3 104106 340352 207255 294326 128128 184212 250254 194254 231251 193197 157161  
114118 120128  
3 100102 340340 231235 282314 128132 208220 242242 214286 243291 197217 173177  
114114 128128  
3 100104 250332 207239 258282 128128 196204 246250 206302 255279 177225 157181  
114114 116128  
3 100106 254340 227239 258298 128132 188208 254266 206302 247263 209221 181181  
114114 128128  
3 100104 336336 207239 186294 128128 188192 258262 242250 231291 225225 193197  
114114 116116  
3 100106 336352 227239 298306 128128 192200 234254 210254 243251 189221 153181  
114114 120128  
3 104104 356356 231235 302322 128128 184196 262262 282286 267267 189209 157161  
114114 128128  
3 100106 336348 223239 262306 128128 192200 234276 210290 243275 181221 177181  
114114 128128  
3 104104 336344 183235 282290 128128 184208 254262 202202 259259 217221 173177  
114114 116128  
3 100102 262356 239243 298326 128128 200200 234262 202202 227247 205205 177193  
114114 128128  
3 104104 328340 183227 290294 128128 188216 258258 202206 263279 213221 185209  
114122 116116  
3 100100 312344 227231 310314 128128 184212 250254 206286 247255 209221 177177  
114114 116128  
3 104104 328344 207227 242298 128132 192220 262276 202302 243247 205225 165181  
114118 116120  
3 100104 328336 207247 274298 128136 184216 254262 206234 231235 193229 181189  
118118 116116  
3 100100 340340 207211 302338 128128 204212 242258 202206 239271 201217 153205  
114114 116128  
3 100104 324348 227247 310318 128128 184208 250254 206286 263275 189237 185197  
114114 116116  
3 100104 320328 207243 290314 132136 184204 246262 282290 255259 189213 145209  
114114 116128  
3 100100 254352 211247 290302 128128 184196 238258 202274 263271 177209 161205  
114114 116128  
3 104104 344352 235259 302302 128128 200220 238276 206274 227259 201209 193193  
114114 116128



3 100104 336352 207227 178258 128128 192212 258262 206206 235267 201233 173201  
114114 128128  
3 100104 274348 231235 298310 128132 196208 234276 198206 223271 209217 201205  
114114 128128  
3 100104 316332 231255 254278 128128 184212 242242 198206 287287 217225 181209  
114114 116128  
3 100104 296352 223235 278298 128128 204220 238258 206210 243255 205225 197197  
114118 116128  
3 100100 336340 207239 282298 128128 188192 234242 210278 243275 197225 157173  
114114 116128  
3 100100 340344 207251 270310 128128 188196 262266 202206 239243 189197 157185  
114114 116128  
3 100102 336340 231231 282302 128136 192192 242250 198202 231255 201213 149201  
114114 118120  
3 104104 270328 235247 274294 132136 188192 238254 202286 235239 213237 169185  
114114 116128  
3 104106 308340 207235 258314 128132 188208 238254 198302 223263 209217 181181  
114114 128128  
3 100100 312344 231239 278286 128128 188224 254270 206206 247267 209217 157193  
114118 116116  
3 104106 324356 211227 290314 128128 192224 242258 202202 231255 209217 181197  
110114 116128  
3 104106 348356 207235 306326 128128 204220 234242 194258 235291 177221 169205  
114114 128132  
3 100104 296356 207231 282294 128128 192196 258270 250286 239247 177205 153173  
114114 116120  
3 100104 344348 207247 282310 128128 184188 250274 202250 235255 205209 197201  
114114 128128  
3 102104 332356 227247 282302 128132 188220 250262 198202 243255 185197 173201  
114114 128132  
3 100104 320368 211239 258314 128128 188196 242276 202302 259275 197225 157181  
114114 116116  
3 104106 348356 207227 290314 128128 196224 242258 202202 227231 201233 181201  
110114 116128  
3 104104 332336 207235 278278 128128 212212 250254 282286 235263 217221 173197  
114114 116128  
3 100104 340356 227231 270294 128128 196200 254262 194282 255287 201201 153193  
114114 116116  
3 104104 254258 207207 298306 128128 204216 254298 270274 231263 205213 185193  
114114 116128  
3 100104 348380 211235 278294 128128 212216 242242 254294 231239 217221 173181  
114114 116128  
3 100102 336340 207227 298302 128128 192216 238270 202286 263283 225225 161177  
110114 128128  
3 100100 336364 223247 298310 128128 192212 250262 206282 271275 217229 185209  
114114 116128

3 100100 340340 231235 290298 128132 184196 250250 202206 227239 217237 177197  
114114 116128  
3 100100 316360 207231 266306 128132 188196 258270 206210 231255 201201 181197  
114118 116132  
3 104104 332348 227231 242302 132136 196220 242254 202302 243267 205209 169189  
114114 116128  
3 100104 258348 211231 282294 128128 180216 254254 198250 223227 189205 157177  
114114 128128  
3 100104 336348 207235 298306 128128 196204 242262 198214 231271 205217 177197  
114114 116128  
3 100104 344348 215243 286294 128128 184188 246254 214258 255287 193193 177181  
114114 128128  
3 100104 250254 227239 258298 128128 192204 234250 198266 239263 177205 169181  
114114 128128  
3 100104 336368 207227 298302 128128 208216 238258 270274 247263 193205 153177  
114114 116128  
3 104104 324352 239251 270298 128128 192224 262276 206282 231287 197201 157181  
114118 128128  
3 098100 262340 207235 286302 128128 208208 254258 214286 223271 197221 165177  
114114 128128  
3 098100 332336 207255 206258 128128 192200 250276 206302 267271 181217 161193  
114118 128128  
3 100104 348356 207223 270310 128128 196204 242274 242250 255275 201209 177205  
114114 116128  
3 100100 274316 207231 290290 128128 204212 242242 202202 243251 169221 193197  
114122 116128  
3 104104 296364 207255 294306 128128 188204 242274 194206 243291 169173 169169  
114114 116128  
3 100100 328344 227243 258274 128128 192200 250266 274278 247251 201213 157169  
114114 116128  
3 104104 336340 207227 282302 128128 184204 262262 202270 239259 177217 177185  
114122 116128  
4 100104 320336 207207 254314 128128 192208 250254 206278 235259 181185 157201  
114114 116120  
4 100106 0 207239 282334 128128 192236 258274 210210 259283 185189 149177  
110114 116116  
4 104104 332360 235239 266314 128128 192212 254270 242282 223235 193213 157169  
114114 116116  
4 100104 316316 235243 294294 128128 188188 246262 202294 231235 185213 177189  
114114 116116  
4 100104 320340 207235 318322 128128 208240 246254 206286 251263 193213 169177  
114114 116116  
4 100112 320364 207207 290322 128128 192196 258270 206206 231231 193205 161169  
114118 116128  
4 100104 320376 207235 294298 128128 192196 250254 202294 243255 205209 177201  
114114 116120

4 100100 332352 211239 306318 128128 192212 250258 198202 231255 193225 193201  
114114 116128  
4 100100 352352 207243 294302 128128 212216 258276 206290 263263 201209 177189  
110114 128128  
4 104104 352364 235243 294294 128136 184212 250258 202210 255275 217229 161177  
114114 116116  
4 100104 332332 243255 302306 128128 204216 242274 198206 251263 185217 161193  
114114 128128  
4 100104 348368 207231 286294 128128 192196 246274 198210 259283 193201 161177  
114114 116116  
4 104104 332332 211235 294318 128128 192212 250258 202202 231255 193225 193193  
114114 116128  
4 100104 340348 235243 266302 128136 192236 250258 202278 243283 217217 177177  
114114 116128  
4 100112 320368 207207 290294 128128 188228 250258 202206 231243 181225 181185  
114114 116128  
4 104104 348368 231239 290314 128128 204228 234250 206218 231235 209225 169177  
114114 116116  
4 104104 352364 207235 270294 128128 192196 250258 210298 259279 177185 149161  
114114 116128  
4 100104 348348 207207 282322 128128 200216 258262 206242 235283 201209 165201  
114114 116128  
4 100104 328340 207235 266278 128128 192192 258274 206278 259271 201225 177193  
110114 116128  
4 100104 348348 207239 282334 128128 212212 254258 206210 235251 185225 169173  
114118 116128  
4 100104 320340 207235 290318 128128 192192 246270 210210 263267 205225 157169  
114114 128128  
4 100104 316316 235235 294294 128128 192216 254258 202206 259283 185209 197201  
114114 116116  
4 100100 340340 211235 282294 128128 208228 242262 210282 255267 205205 177177  
110114 116116  
4 104104 320324 235235 250250 128128 196208 278278 206278 247259 189229 161169  
114114 116116  
4 100104 320368 235235 278286 128128 192200 246250 198202 251263 209229 157161  
114114 128128  
4 104104 348352 207235 274290 128128 188228 230258 286286 267275 197197 169197  
114118 116116  
4 104104 320320 207207 286314 128136 200204 246254 202242 231255 193217 181209  
114114 116128  
4 100104 340340 235243 294298 128128 208236 242258 198202 223275 229249 149173  
114114 116116  
4 100104 332376 235247 290322 128128 188236 250258 202258 243251 205217 177177  
114114 128128  
4 104112 320348 207231 294306 128128 188200 250258 202286 235243 177229 161177  
114114 116128

4 100104 348348 207211 294334 128128 188216 258262 218294 235283 185185 133197  
080114 116116  
4 100114 270274 207239 282306 128128 192204 246258 198210 255267 225225 157177  
114114 116128  
4 100104 348368 207207 278318 128128 188192 254258 202278 231255 185193 197209  
114118 116116  
4 100100 336344 207243 314318 128136 192204 250254 206298 247263 225233 161189  
114114 116116  
4 100100 352364 207231 306314 128128 216236 258274 282294 231263 181181 161177  
114114 116128  
4 100104 324364 235243 294318 128136 188216 246250 210210 231251 185197 161201  
114118 116128  
4 104104 304340 239251 254286 128128 188192 266286 202202 227231 185229 185197  
114114 116128  
4 100104 0 207211 282322 128128 196196 258258 206242 243251 177197 161177  
114114 116116  
4 100104 332348 235243 286322 128128 204204 242242 282286 231283 201217 157161  
114118 116116  
4 104104 332344 235239 282334 128128 192192 250258 210282 263275 217221 157189  
110114 116116  
4 104104 324348 227243 274314 128136 192236 234278 218242 231283 205213 201201  
114114 116116  
4 100104 340352 207227 314314 128128 180212 250254 210298 0 185197 177189  
114118 116132  
4 104104 348348 207235 294322 128128 204208 242250 210282 239275 189201 161169  
114114 116128  
4 100100 320340 235251 226302 128132 188192 246258 206286 251263 185185 169177  
114114 116116  
4 100100 364376 239239 258290 128128 196236 246278 242282 239259 197213 165201  
114114 116128  
4 100106 364364 211235 270310 128132 204240 242258 198202 255259 201217 157165  
114114 116116  
4 104104 348372 207239 0 128128 192236 258270 210258 263279 201213 177193  
114114 116128  
4 100104 332348 231239 226318 128132 188192 254266 206210 235235 193213 169181  
114114 116128  
4 100104 356360 235239 294314 128136 184196 246258 218222 231271 205209 157201  
114114 116116  
4 100104 304304 207235 226302 128128 192200 242270 206282 259259 217217 189193  
114114 116116  
4 104104 372372 235239 290294 128128 192204 258278 202210 247255 213225 193193  
114114 116128  
4 100100 340364 235243 278306 128128 196204 246250 210282 227251 217217 189197  
114114 116128  
4 100104 316348 211243 294294 128128 188192 250258 202294 231243 197213 197201  
114114 116116

4 100106 324348 207235 278294 128128 192212 242266 210214 231251 197229 161201  
114114 128128  
4 100104 352356 231243 282302 128132 212216 242270 214282 231271 213217 177177  
114114 128130  
4 104104 352356 231239 0 128128 192208 254258 218242 251283 205217 169177  
114114 116116  
4 100100 340348 227251 290294 128128 192224 246262 198210 235235 213233 153161  
114114 116116  
4 100104 332332 243243 0 128128 188196 246250 198298 279287 185217 169185  
114118 116116  
4 100106 352352 207207 0 128128 216216 258266 202278 231251 193209 157189  
114118 128128  
4 100100 308308 207247 230294 128128 212212 250250 198202 251275 185209 185189  
114114 116128  
5 100100 348368 207207 302306 128128 188200 246262 202206 239263 197205 181189  
114114 116116  
5 100100 332344 207239 270294 128128 192200 250278 206274 251267 177201 157185  
114114 116116  
5 100104 332340 215247 286286 128128 180216 250258 198202 227271 181205 157177  
114114 128128  
5 104104 336336 207207 174282 128128 184196 226242 198202 267291 181189 157177  
114118 116118  
5 100104 360376 239255 266318 128128 188188 250258 202286 247267 193213 157173  
114118 116128  
5 100104 304340 207219 306306 128128 196216 258266 266282 243271 189197 169193  
114114 116116  
5 100100 336348 207207 274278 128132 188208 258262 202214 239267 201205 177181  
114118 116116  
5 100104 328364 235251 298310 128128 188204 258262 206230 239275 177209 169185  
114114 116116  
5 100100 324328 207235 286326 128128 200212 238246 198206 251263 185217 185189  
114114 116128  
5 104104 336356 207251 274282 128128 180196 242262 222230 235255 225229 169185  
110114 116128  
5 100104 336348 211231 302310 128148 192212 238250 202210 267275 201209 173189  
080114 128128  
5 100104 340356 207207 286310 128128 184212 238250 206214 235263 213217 173193  
114114 116118  
5 100104 300344 207231 254290 128132 192212 262262 202206 283291 217237 181197  
114118 128128  
5 100104 332372 231231 306334 128132 188192 254262 206250 247275 201209 181193  
114114 116128  
5 100104 332344 203219 306306 128132 196200 242258 266282 263271 205229 165169  
114114 116128  
5 104104 352352 207235 286302 132132 200204 226258 210214 227263 197213 161177  
114118 116128

5 100100 300336 207231 270274 128128 196208 238270 194282 267271 205209 157161  
114114 116116

5 100104 340344 203243 274306 128128 204204 254254 258302 263283 189193 157209  
114114 116116

5 104104 344356 207207 210266 128128 196204 270278 210250 223267 213221 157185  
114114 128128

5 100104 332348 219231 294318 128136 192196 258270 206274 251263 193193 189197  
114118 116116

5 104104 332332 235247 270282 128128 200220 266272 206210 243271 193205 185193  
106114 116128

5 100104 344368 207215 310318 128128 196216 254258 258274 231263 193201 177181  
110114 116128

5 100104 328336 207235 294318 128128 196224 242246 226286 267275 205213 177189  
114114 116116

5 100100 328352 235247 266334 128128 196216 238258 202210 251283 181225 161185  
114114 116116

5 104104 270332 203239 278310 128128 220224 246258 214214 227255 185205 193209  
114114 128132

5 104104 336348 243251 306318 128128 200220 250254 238254 259279 201217 177181  
114114 116116

5 100104 344360 239251 274314 128128 196200 242258 206298 259263 201217 169189  
114114 116116

5 104104 328344 235255 286298 128128 196212 254262 206210 227283 205205 157189  
114114 116128

5 104110 300320 211227 262266 128136 184200 258276 198254 235259 173217 181185  
106114 116116

5 104104 328336 235235 318318 128128 192216 258266 202234 227283 197205 173185  
114118 128128

5 104104 246340 207239 282306 128128 188208 242258 186202 275275 221233 173177  
114114 116128

5 100102 300340 207247 262278 128132 200216 254258 214282 271275 201205 177177  
114114 116116

5 100104 344344 207211 278298 128136 192192 242254 198206 259271 201217 185193  
114114 116128

5 100104 336340 207227 302310 128132 184212 250258 202278 247271 217225 173185  
114114 116128

5 104104 324340 243243 282322 128128 192204 242250 194202 251267 197213 177185  
114114 116116

5 100100 324348 207207 258294 128128 196200 254266 198270 207231 185217 189201  
114114 116116

5 104106 332344 207235 294294 128128 208216 254254 206290 227239 209229 185197  
114118 116128

5 100104 332336 207231 278302 128128 196196 246246 202302 223291 197225 185193  
114114 116128

5 100104 344352 235235 266270 128128 200220 266266 198210 247271 217221 161177  
114114 116116

5 100104 324348 207231 290314 128128 192196 254262 198302 271279 193213 177189  
114118 128128  
5 104104 352352 203235 306306 128128 208224 242266 198206 219259 189209 169189  
114122 116116  
5 096104 332340 207235 242282 128128 200212 254254 214310 239259 189205 157181  
114114 116128  
5 100104 258300 207251 226290 128128 192212 238262 214286 255271 205213 177193  
114114 116116  
5 100104 328340 239255 282290 128128 220228 254270 206270 255263 213225 197205  
114114 116116  
5 104104 352352 207235 298298 128128 200220 258262 206286 235271 193217 173185  
114114 116128  
5 104104 270324 203239 278310 128128 220224 246258 214214 211219 185205 193209  
114114 128132  
5 104104 336360 207231 258282 128128 200212 234254 194202 223271 193205 157161  
114114 116116  
5 100100 336348 207239 298330 128128 196224 246262 0 239255 189233 189201  
114118 116116  
5 104104 336348 243251 318322 128128 200212 254262 202238 243259 201221 181181  
114114 116116  
5 104104 328336 211251 298334 128128 180192 254254 202206 251263 189225 169185  
114114 128128  
5 100104 328340 231235 294298 128128 200212 242250 206246 251279 189221 181185  
114118 128128  
5 104104 336356 207227 318338 128128 196196 234258 206238 255275 189205 169185  
114118 128128  
5 100104 332356 239243 294302 128128 184208 254270 278286 223231 209209 181201  
114114 116116  
5 104104 340364 207207 274282 128128 196196 242266 202278 231239 185185 177185  
110114 116128  
5 104104 324360 207239 302310 128140 184208 266282 202202 235267 189193 181185  
114114 116120  
5 100100 352356 207207 278298 128128 196220 246250 198210 251263 189189 173185  
110114 116128  
5 104104 340356 207207 314330 128128 200228 242254 282290 287287 209229 181189  
114114 116128  
5 100104 258340 207207 306322 128136 196216 246274 206250 239243 177177 177185  
114114 116128  
5 104104 336348 207243 262290 128128 200208 250258 206278 251287 189201 193201  
114126 128128  
5 100104 324364 203239 298302 128132 208216 238266 206274 243271 189205 185213  
114114 116128  
5 104104 316332 235243 286306 128132 184200 254262 198274 239243 213217 173205  
114114 118128  
5 104104 340364 231235 262302 128128 208220 258258 202206 231243 189197 157193  
114114 116128

5 104104 352356 207247 270314 128128 188188 226246 210282 215267 185225 165177  
114118 116132  
5 104104 308320 207271 246258 128128 200216 226254 198286 263271 205225 181181  
114126 128128  
5 104104 340368 211247 274290 128128 192204 238238 206278 251283 193213 185189  
114114 116132  
5 104104 320348 231243 310322 128128 188196 238254 202226 247251 197205 185185  
114114 116128  
5 100104 336356 207207 270322 128132 196216 238262 202202 263275 189193 177193  
114114 116116  
5 100104 340348 239263 310310 128128 200216 254262 206222 259267 197201 177181  
114114 116116  
5 104104 316324 203207 294342 128128 200216 226258 198290 231263 205205 197201  
114118 116116  
5 104104 336356 207207 262302 128128 192216 246270 198206 227243 201209 169197  
114118 116128  
5 104104 324348 231247 286294 128132 176196 258266 202218 263275 213217 173201  
114114 128128  
5 104104 324344 203239 278310 128128 220224 246258 202210 211219 181201 193209  
114114 128132  
5 104104 266328 235239 274294 128128 188192 254266 206206 259267 201221 169177  
114114 116116  
5 100100 328332 231235 314314 128136 188196 254266 194210 259267 189213 177193  
114114 116116  
5 100104 356380 207207 262270 128128 188232 242254 202302 215215 185201 177185  
080114 116128  
5 100102 336360 231243 266306 128132 192196 242266 202278 239247 197233 157177  
110114 128128  
5 104104 344352 207231 294310 128128 192196 262262 198210 235283 189217 173185  
110114 114128  
5 100104 348360 235235 258278 128128 200204 254258 194214 223255 189201 185189  
110114 116116  
5 100104 352360 207243 286326 128132 212216 238266 202294 239259 201205 157193  
114114 116128  
5 100104 336336 203207 254318 128128 192232 250282 274278 227251 197205 169181  
114126 116130  
5 100100 332332 243243 290290 128132 200212 238258 202206 251259 221229 181189  
114114 116128  
5 104104 258344 231231 294318 128128 188208 254266 210238 255259 205221 193197  
114114 116116  
5 100104 336348 207211 210318 128132 184192 234266 214290 247275 201221 181205  
110126 116116  
5 104104 332368 207231 298310 128128 184212 254258 206206 239247 213213 157181  
114118 128128  
5 100104 340352 227255 222270 128128 204212 254258 198278 207243 181209 157169  
114118 116116



5 100104 336376 203207 258330 128132 188208 254258 278286 227271 205209 205205  
114118 116128  
5 100104 320336 231235 258310 128128 192200 242250 202210 259259 177213 177189  
114118 128134  
5 100104 340340 207207 262286 128128 196208 266270 242274 215235 189193 173177  
114114 116118  
5 100108 352364 223235 274314 128128 188204 238238 206290 239247 189221 177193  
114114 128128  
5 100104 348348 235247 286322 128128 192200 254266 266282 207275 205217 193201  
114114 116128  
5 104104 340352 211239 282298 128128 192224 258272 198214 227263 181189 185193  
114114 128128  
5 104104 328332 207255 294302 128128 192196 230246 202282 235263 193217 157177  
114114 116128  
5 100104 340364 207207 298302 128128 212216 262278 202206 243247 189209 169177  
114114 116128  
5 100104 266332 207235 270290 128128 196200 266266 198210 267271 193205 153181  
114114 116128  
5 100104 340340 203231 314318 128128 208216 246262 274298 243247 213213 181193  
114114 116128  
5 100104 340380 207207 270286 128132 188220 226238 206210 255267 197213 173209  
114118 116128  
6 100104 352352 235239 282314 128128 192212 246262 210266 219231 185221 173189  
126126 116116  
6 100104 324340 231247 266298 128128 208228 242278 262298 227267 189217 181193  
114114 116116  
6 104114 296324 207255 290326 128128 188208 246258 206218 255263 205209 173177  
114114 116116  
6 100100 336348 231255 262278 128132 192208 258266 198202 255267 205217 161181  
114114 116128  
6 104104 336356 219243 262286 128136 200200 246262 230230 275275 197205 169181  
114114 116128  
6 100104 336356 235235 266314 128128 200204 242246 202206 231271 193229 177193  
114114 116116  
6 100104 348352 207235 250290 128128 212216 242254 186202 231291 189201 177181  
114114 116128  
6 098104 316344 235243 306342 128132 188216 0 242278 259263 189201 181181  
114114 116128  
6 104104 344344 207251 306314 128128 192204 246270 202206 259259 185225 169205  
114114 116128  
6 100104 328344 207251 246302 128132 212220 250258 210270 231259 189197 157177  
114118 116128  
6 100104 336344 243259 302306 128128 192220 262276 206294 223263 209213 177181  
114114 116128  
6 100100 308336 227255 0 128136 196208 242254 198202 251267 205213 157181  
114114 116116

6 100104 320348 207239 282310 128132 192196 238246 286290 247275 213225 181193  
114114 116128  
6 104104 328328 203243 298310 128128 188188 242250 202298 251267 209213 177185  
114114 116128  
6 100100 304332 211243 250306 128132 196224 258258 206218 243243 201209 157189  
114118 128128  
6 104108 348348 235247 318322 128128 192232 0 202202 231243 181201 149157  
114118 116116  
6 104104 352364 207227 258314 128128 204216 242258 194218 227251 217217 157189  
114114 116128  
6 100100 336348 207243 270338 128132 192252 258262 234294 227275 217217 177181  
114114 128128  
6 100104 340340 231243 294306 128128 188200 246250 198198 235271 197213 173181  
114114 128128  
6 102104 320324 207231 310310 128128 204220 246254 202218 243251 197205 177181  
114114 120132  
6 100100 328328 231239 190270 128128 200200 246254 202206 243275 181201 161177  
114114 116128  
6 100100 368368 207231 282298 128128 184192 242258 202202 235267 213221 185197  
114122 116128  
6 100104 336356 207227 258314 128128 200204 262266 202206 235251 185229 157189  
114130 116128  
6 104104 332332 207207 242326 128128 208208 0 198206 243243 173245 181181  
114114 116128  
6 100104 332352 231235 278318 128128 208232 242246 234298 271291 197233 141197  
114114 116116  
6 100100 300348 207243 226294 128128 192212 250266 202282 227243 193213 177197  
114114 116128  
6 100100 332344 235251 190294 128128 212212 254270 202206 243243 213217 177181  
114114 128128  
6 100100 348348 211251 258270 128132 192200 238254 206206 223243 193217 181197  
114114 116128  
6 100104 336364 239243 306318 128128 192192 254254 210218 223235 185201 205209  
114114 116128  
6 100104 332352 207235 270290 128132 188196 238246 206282 231243 193205 177193  
114114 116124  
6 100104 348368 211251 262314 128128 188216 242278 290314 231235 189217 165169  
114114 116116  
6 100102 340368 207251 282286 128128 184212 0 202214 243243 189233 181201  
114114 116116  
6 104104 324348 207231 234258 132136 196208 238258 198198 219259 197197 185197  
114114 116116  
6 104110 348348 211259 306314 128128 192196 250262 286286 271279 177201 189193  
114118 128132  
6 104104 368368 207247 266278 128128 188188 246266 214246 223231 193225 165201  
114114 116116

6 104104 336364 207227 274318 128128 192216 262270 198318 227251 193233 157189  
114114 116128  
6 104116 340368 207207 254306 128128 208212 258270 198246 235235 189209 149173  
110114 118118  
6 100110 312352 231243 234254 0 192212 246250 0 247255 177201 153177 114114  
116116  
6 100104 328356 215247 190302 128132 200220 238258 206210 283283 181233 157157  
114114 116116  
6 100102 308308 243251 274278 128128 192204 254276 198210 247263 185213 157177  
110114 116128  
6 098104 364364 207235 306326 128132 188208 262266 198198 247271 205205 173209  
114114 116128  
6 104104 336340 207211 274290 128128 192220 254254 202290 267267 197217 177193  
114114 118128  
6 100100 344344 239251 286298 128132 196200 246266 198206 247255 217221 173177  
114114 116116  
6 100104 348352 231243 286314 128132 192204 254258 210242 211235 189225 177189  
114114 116116  
6 100104 348364 239251 282298 128128 220224 242262 202210 247275 189213 157185  
114114 116116  
6 102104 340340 207255 302314 128128 192228 246254 198202 207255 193209 177181  
114114 116128  
6 100100 328328 243251 298298 128128 216220 238262 202206 219239 189213 181197  
114114 116128  
6 100104 340368 231239 310318 128128 200212 0 198298 235255 205217 165193  
114114 116128  
6 100100 324364 211247 266274 0 192208 258262 0 231239 185213 177197 114114  
128128  
6 104108 356360 207227 274314 128132 188224 234246 202258 247271 189193 169173  
114114 116128  
6 100104 328328 207231 270282 128128 180200 242262 210270 255283 189209 181197  
114114 116116  
6 104104 336352 235235 258338 128132 220232 250266 202286 239255 197225 169201  
114114 112116  
6 104104 348348 207235 266302 128132 188192 262262 202202 231259 193201 165189  
114118 116128  
6 100100 340348 231247 298322 128128 208208 246262 202210 243251 213225 189201  
114122 116128  
6 100102 336348 207211 290322 128128 188208 238278 198242 251255 197209 177185  
114118 128128  
6 100104 352352 235247 270310 128132 192212 0 202202 227255 197233 161189  
114114 116116  
6 098100 328328 231239 286286 128132 212224 246254 202202 243275 185185 177181  
114114 128128  
6 104104 328352 211211 318346 128128 200200 250270 202206 231255 193197 169169  
114114 116128

6 100104 344352 231239 258302 128128 196224 238242 202242 259271 213225 157169  
114114 116128  
6 100100 304340 231235 278322 128136 196204 262266 206206 243251 213221 173197  
114114 128128  
7 100104 336348 207239 270326 128128 212216 250254 198286 227247 181193 157169  
114118 116128  
7 100104 336340 207247 278290 128128 200212 250258 206298 255259 213217 169193  
114114 116128  
7 100104 336336 235239 258294 128128 204204 258274 198238 223235 185197 161181  
114114 128128  
7 100100 344368 207251 322322 128128 192220 266266 218238 231251 189197 177177  
114114 116128  
7 096104 348360 207239 294322 128128 196216 250278 266282 243287 181197 165169  
114118 116116  
7 100104 250308 207263 190278 128128 212212 238258 202218 227231 177209 181185  
114118 116128  
7 100100 348352 207231 266326 128128 192220 262270 206274 231263 189205 181181  
114118 116116  
7 104104 254292 239239 278314 128128 188208 254262 202206 251283 205209 161173  
114118 116128  
7 100104 262328 231235 286298 128128 188196 258262 202210 255287 181209 157173  
110114 116128  
7 100104 340372 231231 266306 128140 200212 258262 206290 255271 193217 153177  
114114 116116  
7 104110 348356 203239 266266 128128 200200 258262 206294 255267 185193 177209  
114114 128128  
7 100104 312376 239239 250330 128128 196228 250274 214222 215259 185217 201201  
114130 128128  
7 100104 258266 207239 286314 128136 184208 250266 202278 227259 185221 185193  
114114 116128  
7 100100 308376 207247 218298 128136 208216 254262 258270 243267 189193 169213  
114114 116116  
7 100100 340368 207235 250282 128128 200224 258266 206270 215255 213221 161173  
114114 116116  
7 100104 242360 239239 294322 128132 196196 242242 198202 267291 193209 165201  
114114 116116  
7 100100 336348 207255 282322 128132 192200 242246 206206 259259 193205 157169  
102114 116116  
7 100104 308352 231235 306306 128128 200204 246258 202298 255255 205205 157185  
114118 116128  
7 100104 336348 223239 294302 128132 192204 238266 198202 251263 201217 177177  
114114 116128  
7 094104 250324 207231 294322 128136 188204 254266 210258 239259 189217 161193  
114114 116128  
7 100100 336344 231231 310314 128132 196208 250282 202258 231271 197209 181197  
114114 128128

7 104104 348352 223231 310342 128132 192232 262266 286290 227259 181225 157161  
114114 128128  
7 100104 340348 219239 306310 128128 192192 250258 246278 247251 185193 177193  
114114 116128  
7 100100 332344 207243 306322 128136 212212 258262 202202 271275 177221 169181  
114114 128128  
7 104104 308332 211231 266310 128128 192196 234250 266274 251251 205209 169197  
114118 118128  
7 100100 262274 239247 302314 128136 204228 226246 194274 227243 201217 169193  
114114 116128  
7 100100 266344 207211 306322 128128 196212 250258 206294 259263 185193 153201  
114114 116116  
7 100100 270336 207207 278310 128132 184192 254286 202206 263271 185193 185201  
110114 116128  
7 100106 250312 239263 258262 128136 200200 258258 206206 251259 181221 181193  
110114 116128  
7 100100 364380 203231 270298 128136 192204 254258 214214 235271 209217 161181  
114114 116128  
7 100100 348348 207251 286330 128132 188212 238258 206278 235239 205221 197209  
114114 116128  
7 100104 356372 239243 270290 128132 192204 254258 198206 247263 197213 181193  
110114 116116  
7 100100 344352 223235 290294 128128 216224 258262 202322 223243 193205 181213  
110118 128128  
7 100104 308352 247247 306314 128128 192208 254266 198198 227239 197209 157157  
114114 116128  
7 104104 352360 239247 282302 128128 192200 254258 214282 231287 193217 181181  
114118 116128  
7 100104 296336 207211 274318 128132 188192 250262 206278 243275 193217 157181  
114114 116116  
7 100104 296324 207231 286314 128128 188192 238266 202246 239271 189209 177189  
114114 116128  
7 100104 274328 231239 262306 128128 188212 254258 202206 251267 193193 189201  
114114 116128  
7 100104 344352 211239 286302 128128 192212 254258 198206 231275 181185 157173  
110114 116132  
7 100106 316328 207207 310314 128128 180192 254258 198202 235283 193237 189209  
114114 116128  
7 100106 340344 223235 286306 128128 188212 254262 206286 211239 181201 177205  
114114 128128  
7 104108 316356 235239 306314 128128 196216 238242 206206 211259 193209 157181  
114118 116128  
7 100100 258332 235239 0 128128 196212 242250 202206 247263 0 181209 114114  
116128  
7 100100 312360 231239 282318 128128 192200 258262 198290 247275 193201 197197  
114122 116128

7 100104 348352 235247 270314 128128 216228 262270 198202 255279 173209 153157  
114114 116116  
7 100100 262336 239243 0 128128 192196 250250 202206 247255 201229 157197  
110114 116128  
7 100104 324332 235243 262266 128128 188216 234254 206258 255275 189209 153201  
114118 116116  
7 104104 320344 207251 286310 128128 224224 238262 202246 239243 177201 173181  
114114 116128  
7 100104 348352 247267 266274 128128 196200 262262 198206 223259 205217 153197  
114114 116128  
7 100104 316352 207231 294310 128128 204224 246262 206206 227259 205221 193197  
114114 128128  
7 104106 270328 239247 270302 128128 192192 250262 210302 227231 197201 189193  
114114 120128  
7 100104 328372 207243 186306 128128 184196 250258 202202 0 221221 157181  
114118 116120  
7 100104 336352 231235 194314 128136 196212 246258 202202 239255 209221 177189  
114118 116128  
7 104104 0 207239 290318 128128 196216 258290 198286 0 221221 181189 114114  
116128  
7 100100 300320 231235 278322 128132 192204 246290 198198 239247 201201 149157  
114114 116116  
7 104104 328332 239255 226290 128128 188200 258282 202270 215223 193209 161165  
114114 128128  
7 100104 328332 207235 266302 128136 192224 254262 198206 243259 205213 177197  
114114 116128  
7 100104 296316 243247 186306 128128 184196 250258 202202 243243 197205 157157  
114114 116120  
7 100102 0 207247 302322 132136 184216 242246 278282 239255 193205 157177  
114114 116128  
7 104104 324332 235239 270334 128128 196228 250262 198202 235275 209229 185197  
114114 116116  
7 100104 336340 207239 290342 128136 196216 250258 202254 223263 197205 157197  
114114 116116  
7 100104 344344 207211 266298 128132 192200 258262 258294 259275 205209 173181  
114114 116116  
7 104104 348348 207243 310314 128128 192204 250270 194202 247271 177209 133201  
080114 128128  
7 100100 284332 207235 258286 128128 192204 254262 198298 243255 201205 157173  
114114 116116  
7 100104 320336 207247 254282 128128 192224 250250 206278 255275 181209 169181  
118118 128128  
7 100100 348348 207207 0 128128 212228 242262 202306 227267 205245 185197  
114114 128128  
7 104104 308340 231243 250286 128128 188192 242242 198206 231271 197205 161177  
114114 116116

7 100104 332348 231263 266318 128128 192200 246254 198198 239239 185209 161185  
114114 116116  
7 102104 300336 235239 0 128132 184184 254258 202218 251267 213221 149153  
114114 118128  
7 100104 348384 207235 282286 128128 204228 234242 278294 243275 189209 177193  
114114 116128  
7 100100 348360 207231 0 128128 192208 254274 206290 235255 201201 193197  
114122 116128  
7 100100 258300 231263 286298 128128 188212 234250 198290 231267 209245 185185  
114122 116128  
7 100104 296352 235243 310310 128128 184196 258266 202206 243267 193213 185213  
114114 116116  
7 100100 266320 207235 286286 128132 196204 246276 198214 251271 197205 181205  
114126 116116  
7 100104 320340 207207 306318 128128 196204 254258 198206 231235 181217 185201  
114114 116118  
8 100104 336336 207239 338338 128128 204220 242262 206258 239255 205205 185185  
110114 116128  
8 100100 336348 207211 314314 128128 192200 242254 190214 255279 205233 157197  
110118 116122  
8 100100 336336 235235 0 128128 212220 242250 206242 239255 205213 157177  
114114 116116  
8 100106 336336 207235 294322 128128 192204 262270 198214 231291 177233 177197  
114114 116128  
8 100104 344348 231235 274306 128132 196220 242250 198266 231255 197205 185197  
110114 116122  
8 100100 336344 207207 298314 128132 192220 250250 190198 231251 205209 177201  
114118 116116  
8 100100 324336 235239 314330 128132 212220 242254 242262 251255 225233 157197  
114114 118132  
8 100106 336348 235247 250310 128128 192196 262266 214266 231239 177205 197201  
114114 116116  
8 100100 336340 207235 318330 128128 184200 254258 258262 231251 189197 157205  
114118 116116  
8 100104 336348 207235 322338 128128 196224 242250 190214 235291 177221 177197  
114114 116116  
8 100104 336336 207207 250338 132132 192212 242250 190258 227255 205213 177185  
110114 116128  
8 104104 344352 235239 250310 128128 196212 250262 214262 231239 205233 197201  
110114 116116  
8 100104 304352 207207 330338 128132 184192 242250 206266 251255 193205 157157  
114114 116128  
8 100104 340340 227247 314326 132132 192196 246250 202298 251255 189209 177185  
114118 116116  
8 100104 336348 207239 290310 128132 204204 234242 262266 243271 177209 197201  
110114 116116

8 100100 344348 207207 330338 132132 200212 242254 202266 255271 209217 185205  
114114 116116  
8 100100 344352 235239 306338 128128 192220 254262 206258 239255 193209 157185  
110114 116116  
8 100104 340348 239239 322338 128132 212212 246254 190206 239251 233233 177197  
110114 116128  
8 100100 352352 207207 298314 132132 192212 258270 202262 231255 209209 181185  
110114 116116  
8 100100 348352 207247 306322 128128 200212 242254 190198 239259 197233 157177  
114114 116116  
8 100100 336348 207243 326338 128128 192192 250258 198258 239251 189233 157189  
114114 116116  
8 100100 336352 231235 0 128132 204224 242262 190274 239239 205233 177181  
114114 116128  
8 100100 336352 207235 254322 128128 196220 242250 190262 231259 205233 157197  
114114 116116  
8 100100 332348 207207 246254 128132 192196 250254 214262 239291 233233 157177  
114114 116116  
8 100104 336348 235243 306306 132132 196204 242258 198258 259263 189233 181185  
114114 116116  
8 104106 336340 207231 0 128132 196212 246262 258274 231283 205213 157157  
114114 128128  
8 100100 336348 239239 318322 128132 184196 258262 190262 231239 217233 197205  
114114 116128  
8 100100 348352 207235 250338 128132 192212 242250 190206 239251 189233 157181  
110118 116116  
8 100104 340348 207207 298338 128128 184212 254266 262290 211259 205233 157205  
114114 116116  
8 100100 348348 207207 246326 128132 212220 254254 190198 211239 233233 157181  
114114 116122  
8 100100 324336 207207 322342 132132 192212 258270 190206 239239 177189 181185  
114114 116116  
8 100104 336336 239239 306338 128132 212220 250254 206206 227251 193213 157165  
110114 116116  
8 100100 296336 207239 302322 128132 192224 242254 198222 211231 197205 157201  
110114 116116  
8 100100 336348 207235 322338 128132 196220 250266 190262 211251 205233 157181  
114118 116132  
8 100104 348352 207207 278290 132132 192196 250250 274274 239255 213233 165177  
114114 116132  
8 100100 336336 207247 322338 128128 192220 262262 190290 239251 189213 157185  
110114 116116  
8 100104 336356 207207 294306 128128 204204 250258 198258 239259 181205 177185  
114114 116116  
8 100100 336352 231251 258326 128128 200212 242258 202242 231239 205213 177177  
114114 116128



8 100100 336352 231251 254326 128128 200212 262262 0 231235 205209 157177  
114114 116128  
8 100104 328336 207207 306330 128132 184212 250250 198266 239239 205209 157197  
114114 116128  
8 100104 336336 207227 314326 128132 192220 242270 198266 239251 177205 177197  
114114 116116  
8 100100 328348 207239 270302 128128 192204 246250 198206 235251 205213 177197  
110114 116116  
8 100104 336336 207239 306338 128132 204212 246250 206258 239255 205213 157177  
114114 116128  
8 100104 336344 207235 310314 128132 196204 234250 242262 231243 177209 161197  
110114 116132  
8 100100 336340 207235 314338 128132 184212 242242 190206 251251 205205 157161  
114114 116128  
8 100104 336348 235235 326338 128132 220224 258266 190206 239255 205217 157201  
114114 116116  
8 100100 348352 207239 278298 128128 212212 250254 190198 211231 233233 177201  
110114 116116  
8 100104 332356 207207 294338 128132 196212 250250 206214 239247 201205 177197  
114114 116128  
8 100104 336348 247251 322330 128128 192204 262270 190214 247291 197205 185197  
114114 116116  
8 100100 296348 207239 306326 128132 200212 250266 198266 231271 209209 185205  
114114 116132  
8 100104 336348 207239 250326 128128 192220 242258 190198 231255 205205 169185  
110114 116116  
8 100100 336388 235239 298302 128132 196204 242250 198214 239259 213217 157197  
114114 116128  
8 100100 336336 207207 278322 128132 192204 262270 190274 231235 189209 157197  
110114 116116  
8 104104 336336 207235 322338 128128 196224 242262 214258 263291 189233 177197  
114114 116128  
8 100104 336352 207247 254322 128132 192200 242254 190262 231291 205233 157197  
114114 116116  
8 100110 328348 207211 298306 128132 192196 266266 198198 235251 217233 157185  
114118 116116  
8 100104 328340 235239 306318 128128 196220 242262 198262 231251 197233 177185  
114114 116116  
8 100104 324352 235235 298318 128128 192196 242246 190198 235239 177213 177201  
114114 116116  
8 100100 336336 207247 322322 128128 192220 250262 190242 239251 205213 177185  
110114 116116  
8 100104 336348 247251 306338 128132 192196 262270 266290 247291 197205 197197  
114114 116116  
8 100100 328352 211235 298338 128132 192220 254262 290294 231247 205217 177185  
114114 116116

8 104104 336352 207207 250298 132132 212212 258258 190262 239251 205209 169181  
114114 128132  
8 100104 336348 211247 338342 128132 212224 258258 206258 239259 177233 177189  
106114 132132  
8 100104 296352 207235 326330 128128 212212 242254 206242 235259 197205 177189  
114114 116116  
8 100104 336348 207247 298302 128128 192220 254258 198262 259279 209213 177189  
106114 116122  
8 100106 324352 235239 298298 128128 192196 250250 190190 231247 197205 157197  
114114 116128  
8 100104 340340 207239 306322 128128 204224 258258 190198 239255 189213 189197  
114114 116128  
8 104104 348348 235235 306338 128128 196196 246266 206258 251251 209233 177201  
114114 116116  
8 100104 296344 231239 298338 128128 196212 262262 190266 239259 209213 197197  
110114 116116  
8 100100 336336 231235 318326 128128 192212 242266 198298 235259 193213 157197  
114114 116116  
8 100100 336336 207207 246246 128132 192200 250254 190214 239279 205205 157177  
114118 116132  
8 100100 336336 239239 246246 128128 200220 250254 190214 239251 205205 177185  
118118 116132  
8 100100 328336 207207 306314 128128 192212 242262 198202 235251 205209 157157  
110114 116128  
8 100104 336352 235239 322338 128132 212220 246254 206294 239247 205213 177185  
114114 116128  
8 100100 324348 235235 282322 128128 196220 250250 190274 239251 213233 157157  
114114 122132  
8 100100 336348 235239 246338 128132 200212 250254 214262 251255 233233 181185  
114114 116132  
8 100104 328352 211247 306338 128132 212212 258258 198290 231291 213217 157197  
114114 116116  
8 100104 336356 235239 266338 128132 212212 246254 206262 227255 193205 157165  
114114 116116  
8 104104 348352 207239 290310 128132 204212 242250 262266 231259 197209 161185  
110114 116128  
8 100106 304340 207207 310314 128128 196220 242262 198242 239251 201209 165197  
114114 116128  
8 100100 344348 207207 306338 128132 192196 254270 198266 251255 197209 157169  
114118 128132  
8 100100 336336 207207 322322 128128 220220 242262 190190 231239 189189 157185  
110114 116116  
8 100100 336340 235243 250298 128128 184204 250262 190274 231255 181189 161197  
114114 116128  
8 100104 324364 239239 246258 128128 196200 250266 202274 231263 201233 197197  
114114 116128

8 100104 336348 235251 322338 128132 196212 258270 214290 231231 197205 185197  
114114 116116  
8 100104 336344 207207 314326 128128 196220 262262 198202 239255 181209 177181  
114114 116116  
9 100104 348348 207239 286290 128132 192212 242250 198242 255275 213213 185213  
114114 116128  
9 100104 332352 207243 258258 128128 184192 262262 198210 259267 181229 177181  
114114 116128  
9 100104 344368 207227 278294 128128 220224 246258 238282 255271 185197 165185  
114118 116116  
9 100100 356376 235255 258294 128128 200208 254266 198290 259263 209213 193201  
114114 116116  
9 100100 348348 207255 274294 128132 208232 262274 202214 255271 213237 169181  
114114 116120  
9 104104 324340 207207 270290 128132 184220 246254 198242 259271 201221 185193  
114114 116128  
9 100104 344348 227251 306314 128132 192204 242266 202274 235299 205217 157177  
114118 128128  
9 106106 340352 211243 0 128128 212220 246250 250250 251275 201205 197197  
114114 128128  
9 100104 328364 207239 274306 128128 208220 262276 202246 251255 209217 157177  
110118 116116  
9 100100 348348 207239 274278 128132 208212 262274 198202 263271 213237 169185  
114118 116116  
9 100104 348348 239239 290290 128128 212220 258262 202250 251275 213217 157181  
114114 116116  
9 100100 328332 231239 274298 128136 196208 0 202230 251271 205217 157189  
114114 116116  
9 100104 332348 207231 270334 128132 200212 258274 198282 251271 205209 193197  
114114 116116  
9 100104 340360 219235 286298 132148 188208 254258 198282 227255 209213 197197  
114114 116116  
9 100104 304340 207239 302318 128128 192204 242262 202222 255255 209217 177181  
114114 114116  
9 100104 336392 207235 246314 124128 200216 234250 206250 251275 205221 181193  
114114 128128  
9 100104 348392 227231 294302 128128 196204 254278 206210 231259 217225 181185  
114114 128128  
9 100100 352352 235235 294302 128128 212224 242258 202202 275295 193213 169173  
114114 116120  
9 100104 352356 207235 322346 132132 188220 238290 206214 243255 197225 157173  
114114 116128  
9 100104 348348 239247 274322 128128 216220 246254 202290 259263 209213 169169  
114114 116116  
9 100100 266312 231239 290290 128128 184220 266276 202250 243251 193213 177181  
114114 116116

9 100104 348352 207211 266278 128128 192208 226262 198266 263291 189197 177181  
114122 128128  
9 100100 312356 207239 270274 128132 200212 250254 242294 243275 209213 185201  
114114 116120  
9 098102 266336 239243 266290 128128 188224 250262 206210 243251 193245 157177  
114114 116116  
9 100100 348348 211235 198302 128128 216224 246262 246262 251263 209221 157181  
110114 116116  
9 100104 348376 207255 266266 128128 216232 250274 198282 259291 185205 169177  
114114 120128  
9 100104 250368 207211 278306 128128 188192 238250 210210 259271 201217 157169  
114114 116128  
9 104106 344376 243243 294322 128128 192192 262262 206270 231271 181209 181197  
106114 116128  
9 100104 336352 239247 274346 128128 192220 238258 202206 243271 193213 181185  
114118 116128  
9 100104 316348 207231 298346 128132 184220 262266 202290 251275 217245 177193  
114114 116128  
9 104104 320352 207235 302326 128128 200220 262266 198266 243267 193205 177177  
114118 116116  
9 104104 316352 231255 294298 128128 192192 246278 202270 267271 189221 181181  
114114 116128  
9 100104 308368 207211 294294 128128 192220 246250 270290 247291 197217 177193  
114118 116128  
9 100104 344348 207239 274294 128132 208232 250262 202214 263271 209213 161185  
114114 116128  
9 100104 300376 231239 226342 128136 192224 238262 198286 239263 209217 177185  
114114 114128  
9 100100 320352 207239 258266 124128 212228 254254 198198 227255 205209 177181  
110114 116128  
9 100104 316348 235239 258298 128136 192192 250262 198202 243263 189213 177181  
114114 128128  
9 104104 340376 207207 226282 128128 192200 258262 214286 235259 209217 177181  
114118 116128  
9 104108 320340 211251 282298 128128 192224 250270 198206 219263 213221 189193  
114118 116128  
9 100104 348348 211235 198290 128128 200204 250266 202290 243259 205209 181185  
114114 116128  
9 100104 340348 235247 270294 128128 192224 258258 198214 231255 189237 169197  
114114 116128  
9 104104 324324 207207 270290 128128 192224 254262 190198 231263 189205 177181  
114114 116128  
9 100104 324340 207207 278282 128128 184220 246254 198270 243259 201221 189193  
114114 116116  
9 100104 336348 235243 270290 128132 200212 254270 202210 235259 205209 189201  
110114 116128

9 100104 348348 239247 278282 124128 196200 226266 198214 259263 209213 169201  
114114 116120  
9 104104 304312 207243 274302 132132 196208 234242 202222 231271 209217 181197  
114114 128128  
9 100104 332336 207243 270338 128132 200212 258270 206238 227243 221225 157185  
110114 128128  
9 102110 348352 231255 282294 128132 196212 266266 214282 231231 213229 173181  
114114 116120  
9 100104 344356 207231 258290 128136 192232 246250 198210 255255 213217 177181  
114114 122128  
9 100100 328336 211211 274298 128128 184220 250262 250286 243267 217221 161193  
114114 116116  
9 100100 352376 243255 278302 128128 192220 234262 206210 243259 209221 177185  
114114 116128  
9 100104 266348 207239 270298 128132 220220 258276 198202 231259 189213 177177  
114114 116116  
9 100100 344348 207207 274278 128132 208232 250262 198202 259263 209213 169185  
114114 116116  
9 100100 340368 211251 262282 128128 208220 242258 202282 215271 197217 197201  
114114 116116  
9 100110 320332 235239 274346 128140 184188 262266 202206 243251 197209 157197  
114114 112128  
9 100104 356376 207247 258290 128132 192232 246250 198210 247259 209213 177177  
114114 116116  
9 100104 336344 207235 254294 128136 188220 242258 202202 251275 205209 181185  
114118 116128  
9 100102 348368 207255 286294 128128 220224 250258 206282 231247 205221 177181  
114114 116116  
9 100100 340340 207239 270298 128132 184208 254258 198202 251271 217221 177181  
114114 116128  
9 104104 332376 207243 166294 128128 188192 246250 210270 247259 189209 181201  
114114 116116  
9 100104 356376 207247 274294 124128 200220 246262 202202 259263 221233 169189  
114114 116128  
9 100100 340352 207207 278282 128128 200200 246250 198270 243271 197221 181189  
114114 116128  
10 104104 308332 235235 270290 128128 196216 246254 202234 243291 181201 173173  
114118 118128  
10 100100 328332 207231 270314 128132 192204 258270 198266 251263 189201 169201  
114118 116116  
10 100106 332360 231239 246286 132132 196196 234258 198294 279291 181201 157177  
080114 116128  
10 100106 348348 207231 270274 128128 192196 258262 206222 247251 205209 185185  
114114 116128  
10 104104 328348 231235 270314 128128 196204 262262 198222 235279 201209 169173  
114114 116116

10 100106 332336 231231 246302 128128 192196 250274 222286 243255 193201 157173  
114114 116116  
10 100102 332340 207231 178246 128132 188192 254262 202286 259291 193201 193209  
114114 116116  
10 104104 328348 207231 258330 128128 196204 238254 202210 227255 181217 197209  
114114 116116  
10 104106 316356 207207 246246 128128 204244 262266 198278 255259 209209 185205  
114114 118128  
10 104104 328348 207231 258314 128132 184192 242254 210294 227255 217229 157209  
114114 116116  
10 098104 332348 207235 246246 128132 188196 242262 202210 227259 189189 185225  
114114 116116  
10 100106 266332 231251 246314 128132 200200 238262 206286 235251 193193 193225  
114114 116128  
10 104104 340348 235235 294314 128128 196204 258262 210214 279279 189201 177197  
114118 116116  
10 100100 328356 207239 270314 132132 200244 258262 202246 259291 209209 157173  
114114 116128  
10 100100 328328 227231 270290 128128 192200 254254 246270 227263 197201 193213  
114118 116118  
10 100100 316348 207239 258286 128128 188196 250258 234294 259267 201221 189197  
114118 116128  
10 104106 328328 207235 270270 128132 196204 242242 202222 227255 201225 173193  
114114 116116  
10 104106 328352 227231 178314 128132 196196 254258 202202 247275 197209 185209  
114114 116128  
10 098104 340356 207235 246314 128128 196212 242242 202234 255263 181209 193225  
114114 116116  
10 098100 332344 207207 302314 128132 196204 254262 202294 227247 193197 0  
114114 116118  
10 100106 266340 211231 238286 128128 188196 242250 202246 239271 197221 169201  
080114 116128  
10 100104 328332 231231 178246 132132 188192 254262 202286 243259 193201 185193  
114118 116116  
10 100104 332352 231231 246330 128132 204204 234266 202202 235263 189209 173193  
114118 116128  
10 098100 226238 231231 246314 128132 192212 242250 202294 271291 181201 157213  
080118 116128  
10 100100 254332 207239 246270 128132 192204 238270 202246 247279 213213 169185  
080114 116128  
10 100100 266332 231251 302306 132132 200200 238262 206286 235263 193193 169193  
114114 116128  
10 102104 316328 207231 178246 132132 196196 254258 198202 259263 181193 185209  
114118 116116  
10 100104 348356 207211 258318 132132 184196 238254 210294 227279 181217 197209  
114114 116116

10 100104 332356 239247 246246 128128 192192 250258 198234 235259 209209 157205  
114114 116118  
10 100104 332352 227235 274314 128128 196216 258262 274286 227263 189201 161169  
114114 116128  
10 104104 324340 207231 246290 128128 184196 250262 198202 227255 209213 185197  
118118 116116  
10 104104 324328 235243 298330 128132 196200 246258 202202 255263 193205 177197  
114118 116116  
10 104106 328336 207239 290306 132132 188192 242258 222234 247259 197205 189213  
114114 116116  
10 100106 348348 231247 290298 128128 196196 246254 290294 239259 189201 193205  
080114 128128  
10 098104 254348 207207 286314 128132 196216 246286 202286 259271 209217 185193  
114114 116118  
10 100106 340348 227235 270294 128128 196212 262274 206290 247259 189197 185185  
114118 116128  
10 102104 332332 207211 178270 132132 196196 254258 198230 247259 193205 185185  
114118 116116  
10 100100 328352 231231 270330 128132 192200 254286 202262 227279 181201 213213  
114114 116128  
10 104104 308352 227235 270290 128128 196200 246254 202234 243267 181205 173185  
114114 118128  
10 100104 316328 207239 270286 128128 188196 242262 202234 227255 201209 169185  
114114 116128  
10 100104 320340 239243 270298 128128 192196 238242 266294 235251 225225 201201  
114114 116116  
10 100100 332340 207223 178246 128128 192196 238286 246254 255279 201213 169201  
114114 118128  
10 104104 328332 227235 270290 128128 196200 246254 198202 243267 193201 169173  
114114 116128  
10 100106 332364 231239 246246 128128 192196 250258 198234 227263 181201 157169  
114114 116116  
10 100100 328348 207207 306314 128128 192192 238250 198306 243259 209221 169189  
114114 116116  
10 104106 316336 207239 226270 128132 196208 242258 202206 227255 209233 197201  
114114 128128  
10 104104 254316 207211 258298 128128 196196 238266 282286 243247 177209 157213  
114118 116128  
10 104104 328332 207231 298314 128132 192196 246258 202242 263267 181201 169205  
114114 116116  
10 098104 328348 207231 270302 128128 192200 238258 198202 227263 201209 169197  
114118 116116  
10 100104 324348 207207 306314 128128 200244 258270 266286 251267 201225 161201  
114118 116128  
10 100104 316328 207239 314370 128128 192196 254266 198202 231243 209209 169205  
114114 116116

10 104104 328340 207231 286314 128128 200204 242258 198202 243255 201201 185197  
114114 116128  
10 100104 262328 231239 298330 128132 196212 258274 202290 255263 193193 185197  
114118 116116  
10 100100 316332 207235 246306 128132 192196 254258 202210 227275 201201 161185  
114114 128128  
10 100104 316328 239247 330370 128128 192196 254266 202206 231259 209209 169189  
114114 116128  
10 104106 348356 207235 270310 128128 192196 258262 206286 255279 181189 169205  
114114 116128  
10 104104 328352 227235 270290 128128 184216 242258 198202 243267 193201 169173  
114114 116128  
10 104104 328352 235235 270290 128128 184216 254258 202234 267291 193205 169185  
114114 116128  
10 100106 328340 207235 266270 128132 196204 242286 222234 255263 181225 173193  
080114 116128  
10 104104 316348 231251 290294 128128 192196 238262 274286 259279 221221 185185  
080114 116118  
10 100104 328348 207231 290314 128128 192196 238258 286286 231271 197205 161185  
080114 128128  
10 104104 316340 231235 270306 128132 188196 250254 202234 227255 201201 213213  
114114 116128  
10 104110 316332 207227 270270 128128 192204 250262 198210 247271 181201 169185  
114118 116128  
10 100110 332348 207231 246270 128144 192192 238270 202246 259279 201213 169201  
114114 118128  
10 104104 328332 231231 270330 128132 196196 238270 202202 235263 201205 185213  
114118 116116  
10 098104 254332 227235 286302 128132 192244 258262 210234 247271 201209 165169  
114118 116128  
10 104106 266348 231251 302306 128132 168200 242262 198206 235251 181193 185225  
114114 128128  
10 100100 312336 231239 274314 128132 200200 242258 202202 247259 213221 185189  
114114 116116  
10 104104 348352 211235 270270 128128 192216 238254 202206 259291 201221 173193  
114114 116128  
10 100104 316332 231231 290330 132132 192196 254262 202202 255263 189201 193201  
114114 116116  
10 098100 328348 227231 270298 128128 192196 254258 206246 243263 197197 189205  
114114 116118  
10 104106 266348 223231 302314 128132 168200 242262 198206 247251 181201 169185  
114114 128128  
10 106106 320360 243251 246286 132132 168196 234262 198202 259271 193201 177189  
080114 116128  
10 100104 328360 207227 290314 132132 200220 258262 198206 255259 201205 189205  
114118 116116



10 104104 328332 227235 246290 128128 196200 242246 202234 243291 193205 169185  
114114 116128  
10 104106 266348 223223 302306 128128 200200 238254 198206 235251 181193 169185  
114114 128128  
10 104106 316332 207231 274294 128128 196196 242266 202222 235255 197221 169185  
114114 118128  
10 104106 332332 231231 282314 128128 192196 250274 286298 231243 193201 157169  
114118 116116  
10 100104 328332 207247 246270 128128 200204 254262 234246 231279 189201 169201  
114118 116128  
10 100104 316328 207247 306314 128128 168196 250266 198306 231259 209209 169189  
114114 116116  
10 100100 352352 231239 290290 132132 192216 270286 270270 231247 201209 169181  
114114 116128  
10 104106 340348 231231 246246 128132 188212 254254 202202 259291 201213 161185  
080114 116128  
10 104110 316340 227235 246330 128128 192192 250258 198206 259279 189217 169201  
114118 116128  
10 104104 332332 227231 298330 128128 192208 238262 294294 235247 189201 169169  
114114 116116  
10 104104 316340 231251 270290 128128 192212 242254 210290 243279 209209 197201  
114114 116128  
10 106106 332360 207231 258306 128132 192196 242262 210294 247247 177197 161185  
114114 116116  
11 100100 320340 231243 278290 128132 200208 242258 198202 243263 209209 157177  
114126 116128  
11 100110 336336 227243 282286 128128 200264 238254 206258 267271 205209 177185  
114114 120128  
11 104108 340348 235239 318318 128132 188192 242246 202270 235267 209221 157173  
114114 116128  
11 100104 336340 219243 322330 128140 196204 242246 202266 251255 213213 145177  
110118 116116  
11 104104 320352 231239 194314 128128 184196 242246 270278 255267 185217 153161  
114114 116116  
11 098110 308352 223231 238318 128132 192224 242274 258274 251251 201213 173173  
114114 116128  
11 104110 360360 231243 286310 128132 192204 234242 198274 223247 209221 145173  
114114 116128  
11 100104 340344 235235 214342 128132 192200 242262 202278 239247 213217 165181  
114114 116128  
11 104110 328340 223243 282318 132132 196204 238242 202274 231255 197209 157157  
114114 0  
11 104110 352364 243243 262310 128128 204268 250258 270290 255263 217229 173177  
110118 116116  
11 104110 312340 223255 194330 128132 200204 242242 206274 231239 213217 145149  
110114 116116

11 100104 340356 223235 326338 132132 200208 238242 202262 223227 201229 145173  
114114 116128  
11 104104 320328 231231 306326 128128 196220 246250 0 227231 193193 157197  
114114 116128  
11 100104 242348 227243 174322 124128 196208 238258 274290 235267 221225 173201  
114114 116116  
11 100104 320360 211239 282326 128128 208252 242242 198202 231271 185213 145185  
114114 116116  
11 100104 328360 207243 270330 128136 196216 238238 274286 259275 209217 165201  
114114 116128  
11 100106 352368 239239 326330 128128 196212 242262 274282 235239 205217 157173  
080114 116116  
11 104104 336344 231235 302326 128132 188196 246258 202274 255259 181205 161173  
114114 128128  
11 100100 308336 219235 202294 132140 196212 230242 198210 227231 209217 177181  
114118 128128  
11 100110 332360 219223 314394 128128 196216 250270 198206 263267 209217 165173  
110114 116128  
11 100104 332336 239243 290326 128128 204232 242246 198202 255259 217217 169189  
114114 116116  
11 096104 336340 223231 230294 128132 196204 254270 262274 259267 205213 157185  
080114 128128  
11 098104 336344 219251 182302 132132 196200 246246 198202 235251 201217 145185  
114114 116128  
11 098100 328340 219235 178310 128128 192244 238266 202282 239259 217225 169189  
080118 116128  
11 104110 340344 211223 290294 132140 200216 242262 242278 255263 185185 157189  
114114 116116  
11 100104 328336 227251 194214 128128 184188 238282 202230 243247 213217 145169  
114114 116128  
11 100104 336340 223239 306358 128132 192232 234238 198198 231231 185213 173185  
114114 116116  
11 098104 336344 207235 262278 128132 184192 238242 202206 247275 205209 173181  
114114 116128  
11 104104 340352 219223 282298 128128 196196 238238 270282 219231 201205 153173  
114114 128128  
11 100110 344356 231231 286326 128132 196212 226258 202202 243255 217221 157169  
114114 116116  
11 104106 316336 239243 290294 128128 192192 238262 202214 223243 209213 157181  
110114 116128  
11 110110 340344 235247 198342 128132 192212 258278 246270 247247 201209 161201  
114114 116116  
11 098098 320324 223223 246298 128132 196216 238242 202210 251267 201217 181197  
114114 116128  
11 110110 320340 231235 310342 128132 196212 226270 238266 247267 213225 173193  
114114 128128

11 104110 312364 223223 318326 128132 196232 238246 278294 243247 201217 165197  
122122 128128  
11 098104 348364 231239 254294 128132 188204 242242 206274 231235 213221 173177  
114114 116116  
11 104104 352360 239243 310326 0 204212 250250 234282 255255 205205 157169  
114118 128128  
11 104104 332344 223231 198298 128128 204216 258258 234318 235259 201209 161189  
114114 116128  
11 104106 328336 223243 190318 128144 184200 242270 206270 215271 209213 153177  
114118 116128  
11 104104 320324 211223 302326 128132 192196 242242 206294 247251 209213 173177  
114114 128128  
11 100104 332348 223235 258286 128132 184192 254270 202282 215267 189209 173173  
114114 116116  
11 104110 336352 231235 210210 128132 196204 234242 206230 231235 213213 157173  
114114 116116  
11 104106 344356 235243 194358 128128 204204 254254 210230 251255 213217 185185  
080114 116116  
11 104110 352356 203231 198294 128128 188192 238262 206274 239247 217225 165189  
080080 116128  
11 104110 336360 231239 330334 124136 184196 238254 202282 255263 197221 185185  
114114 116116  
11 100106 344356 207235 214314 128140 192208 230246 238278 251263 213217 177201  
114118 116128  
11 104106 332348 231243 298302 128140 196200 250282 198270 247259 209217 169173  
114114 116116  
11 100104 340352 211211 198286 128128 204252 242242 186202 247275 213221 157177  
114118 116116  
11 104110 348352 207235 294314 132132 188224 270270 226250 235255 205217 177177  
114114 116128  
11 100104 340348 223231 310322 128132 196200 242250 198202 227235 205209 145153  
114114 116128  
11 098100 324336 239251 298314 128132 208224 242270 202226 247255 213221 173189  
114114 116118  
11 104108 348352 211231 306318 128132 196228 258270 230266 231255 197217 169173  
114114 116128  
11 100110 316340 231247 282298 124132 200200 250270 226270 235243 217217 145209  
114114 116128  
11 100110 344344 223235 214342 128128 192200 242262 202278 239247 205213 165173  
114114 116128  
11 098104 320352 223231 214298 128132 192204 234238 274286 247251 197217 157165  
114114 128128  
11 100104 312360 199251 282294 128140 192196 254258 278298 259271 201213 173173  
114114 116128  
12 100100 332352 243251 262310 128128 204204 254274 198282 231231 205205 193205  
114118 116128

12 100100 304344 231235 274314 128128 192196 246262 198294 215283 213225 157197  
114118 116116  
12 104114 332340 207207 274282 128132 196208 250292 198202 243255 201213 173197  
114114 116128  
12 100100 336352 231243 266314 128128 196208 238246 246254 243259 181217 157157  
114118 116116  
12 100100 376376 207251 258266 128128 204212 246258 198202 231243 205205 197205  
114118 116128  
12 100100 340364 207239 286302 128128 188192 238266 198206 243275 213217 165197  
114118 116128  
12 090104 332336 207243 282286 128136 184196 242242 198202 263263 209209 157165  
114114 116128  
12 100100 336352 207231 262266 128132 200204 238242 206294 235243 189205 197205  
114134 116116  
12 100100 332336 207251 310334 128128 208212 242242 198234 247259 205233 173197  
114114 128128  
12 098104 328336 231251 278282 128128 200200 258258 202258 231243 197213 157197  
114114 116116  
12 100100 328332 207215 274290 128128 212240 238254 262290 239263 181213 181197  
114114 116116  
12 100108 336344 227231 274310 128128 188192 254258 198298 251275 197221 181205  
114114 116116  
12 090104 332348 231231 266274 128128 200208 262266 194294 251275 197225 177181  
114114 116128  
12 104104 336348 231235 266274 128128 200204 250278 198202 243263 193221 157181  
114118 116128  
12 100104 324332 231231 278310 128128 188204 258266 202274 255267 205209 149181  
114114 116116  
12 100100 328340 207231 202278 128132 184208 242246 214258 247259 197209 157193  
114118 116116  
12 100100 336352 231259 258258 128128 196200 238250 206246 223243 209221 169197  
114114 116116  
12 104110 332332 235247 282286 128132 192200 250266 202266 235247 209217 169185  
114114 116128  
12 100104 322340 207207 306310 128132 208212 238262 202210 231243 213233 157205  
114114 116118  
12 100104 332352 223231 250306 128128 200212 254258 202202 223255 209233 157189  
114114 116116  
12 090100 332352 219227 286314 128128 196200 242266 206214 223231 201205 141181  
080114 116116  
12 090100 332340 207231 274294 128128 200208 238250 198246 255263 205221 157161  
114118 116116  
12 100100 344368 235235 266290 128128 180196 258274 198246 215259 205213 165205  
114118 116116  
12 100100 332340 231255 282294 128136 176192 254266 246282 263275 197201 157197  
114118 116128

12 098100 332344 211227 254298 132136 188192 238238 202242 231263 197221 141177  
114114 116128  
12 090100 344352 235243 278278 128128 196212 242258 258274 231243 205205 165197  
114134 116128  
12 088100 348348 207223 266310 128128 192204 238242 206282 227263 197209 185197  
114114 116118  
12 100104 340368 231231 274274 128132 192196 242254 198206 231231 197213 173181  
114114 116128  
12 100104 328348 231231 258302 128128 212236 234250 198206 215219 201213 157193  
114114 116118  
12 104104 344344 207231 266266 128128 188204 242246 202206 235243 189193 165177  
114114 116116  
12 100104 344344 215231 278286 128136 200200 238254 198246 215271 181197 165209  
114118 116116  
12 100104 332348 231231 274322 128132 192196 250258 198202 235247 193197 181197  
114114 128128  
12 100100 332348 207231 286298 128128 188196 238254 238274 239263 197209 149197  
114114 116118  
12 104104 344360 231231 282282 128132 204208 242278 198246 231239 197205 157177  
114114 116116  
12 104104 332352 207207 274322 128132 196196 242292 202202 239243 197233 165197  
114114 118128  
12 100100 344348 207227 298310 128128 196200 242254 206246 231243 197205 189205  
114114 116128  
12 100104 344368 207227 310322 136148 196200 238250 202246 231235 197197 157157  
114118 116116  
12 104104 316324 239243 322322 128128 192212 258262 206266 207251 201237 189197  
114114 116128  
12 100102 332360 231235 298326 128128 188204 242284 202294 231263 209225 157161  
114114 116128  
12 100100 356368 207235 274302 128128 196200 246292 0 231275 197217 165197  
114118 116128  
12 100104 332352 219235 250302 128128 192200 254254 0 259263 205209 157177  
114114 116128  
12 100114 332352 231235 286298 128128 208236 234254 198246 255267 201205 177205  
114114 116128  
13 100104 332332 235243 246250 128128 192196 238246 0 251251 201213 177189  
114114 128128  
13 100100 0 207211 178194 128128 188200 230242 262270 239263 185189 169189  
110118 116128  
13 100104 328336 211243 198250 128128 192204 238242 198254 243259 177189 177197  
110110 128128  
13 100100 316356 231239 214242 128132 192196 238246 202270 243251 189201 177181  
110114 128128  
13 100116 332336 211219 246286 128128 184204 238238 198198 251271 193201 193197  
110114 128128

13 100102 0 207239 246282 128132 196204 238242 266266 231247 173201 177201  
114114 116116  
13 104104 336336 211243 246362 128128 184196 238250 270274 243251 177189 177177  
110110 128128  
13 100100 328340 235263 210242 128128 196204 238250 202234 251291 193201 185189  
110114 128128  
13 100100 336340 239243 246270 128128 196200 246246 266274 227251 185225 177181  
106118 116128  
13 100100 340344 231243 202250 128132 192196 238246 230234 251251 181209 185197  
114118 128128  
13 098100 336340 211235 178266 128136 208212 238266 246262 243291 193197 185189  
114114 116116  
13 104116 344344 231235 214282 128128 196220 238238 270274 235251 189193 185209  
110118 116128  
13 100100 348352 235243 214242 128128 192216 242246 198238 251287 185213 161189  
110114 128132  
13 100116 336352 207243 186206 128128 196208 238238 230238 239251 173177 177185  
114114 116128  
13 100104 340344 211231 198274 128136 196204 238246 242270 227239 177213 185205  
114118 128128  
13 100104 340356 219239 282322 128128 196204 238238 246258 251259 193213 177209  
110114 116128  
13 100104 344348 239243 214250 128132 192204 230294 266270 259267 189193 181181  
114114 128128  
13 100100 352372 211235 230250 128128 196196 234246 270274 243255 193217 169177  
114114 116116  
13 100100 324356 239243 182338 128128 208208 238250 246266 239287 189193 177201  
110114 118128  
13 104116 340344 207235 286310 128128 196200 238246 202262 271283 201213 185185  
110114 128128  
13 100100 340348 235235 190278 128136 196200 238250 242274 239247 189193 161181  
110114 128128  
13 100116 312368 211239 294302 128128 196204 242246 202242 235247 177193 177177  
114114 116128  
13 100100 328340 231235 238274 128128 192212 242246 262270 243251 185205 193205  
114114 116128  
13 104116 340360 235235 186294 128128 184216 238242 262270 239263 177189 181185  
114114 128128  
13 100100 340364 239239 258294 128132 192204 246246 198278 251263 197201 189205  
114114 128128  
13 100104 344368 227235 202246 128128 192200 242262 198242 251251 181205 169189  
114114 116128  
13 116116 340352 207243 246310 128128 184192 238246 262262 227259 173201 181185  
114114 128128  
13 098100 328332 235239 174282 128136 200204 238238 258266 243259 173189 177197  
114114 128128

13 100104 324344 227235 246246 128128 200204 238238 258266 231235 185205 169169  
110114 116132  
13 100104 332340 207231 250342 128128 200212 234246 194294 255263 177181 177189  
110114 128128  
13 100102 336348 235243 286298 128128 192200 238238 202238 251251 181193 185185  
114114 116128  
13 104104 324328 235239 178278 128136 192212 238246 242262 251263 197197 185201  
110118 128128  
13 100100 324344 235239 174258 128136 216216 238238 242270 247251 185185 185193  
110114 128128  
13 100104 324336 207211 174246 128128 192204 234238 238278 219247 197201 185205  
110114 116128  
13 100116 340360 235243 142274 128128 192196 238246 238270 243243 185197 161193  
110114 128128  
13 100104 0 211211 206210 128128 188192 238274 238266 255275 181189 181197  
114114 116128  
13 104116 0 227235 194210 128128 200220 238270 262270 227251 201221 177181  
110114 128128  
13 100102 344376 211235 174198 128128 192196 238274 202270 247251 185193 185201  
114118 116128  
13 104104 336348 231243 198242 128128 192208 238278 238270 247247 193209 181185  
114114 128128  
13 100116 324352 211231 198202 128128 196208 242274 198198 247251 189201 177197  
110118 116132  
13 100100 324340 235243 210234 128132 196216 246246 198262 251255 185205 181185  
114114 128128  
13 100104 328336 211235 198250 128128 196208 238242 198238 223239 189193 181189  
114114 116128  
13 100100 336336 231235 174210 132136 192208 238246 198266 235251 193201 173177  
110130 128128  
13 100116 340344 211239 242302 128136 192204 238242 266294 247275 185189 189209  
114114 116128  
13 104116 328352 235247 198250 128132 188208 238242 194202 227247 181189 177189  
110114 128128  
13 100100 324336 211215 0 128128 192196 238246 234238 251251 201213 173193  
110114 116116  
13 100116 348352 239247 0 128128 188200 238246 234238 243243 173193 181181  
110110 128128  
13 100104 356360 211243 0 128132 192208 238238 198258 239251 189197 185197  
114114 116128  
13 100104 344344 207239 178314 128128 192200 242246 198202 247247 181201 181185  
114114 128128  
13 104116 340348 227243 246306 128128 192208 238258 266270 243259 201213 185185  
114114 116128  
13 100104 344384 219235 0 128128 192196 238238 282286 247259 189197 193205  
110114 128128

13 100100 324344 227231 198246 128128 192200 238238 258274 247247 193197 169185  
114118 116128  
13 100114 352356 231247 246250 128128 188200 238250 238262 243251 177193 161189  
110118 128128  
13 100104 0 207211 170174 128128 192196 238246 202254 247251 173185 173209  
114114 116128  
13 104116 336352 227235 182182 128132 188196 238250 262274 251251 193213 197205  
114114 128128  
13 104104 328352 207235 182206 128128 184188 238238 238266 251259 193201 173177  
110114 128132  
13 100108 340360 235235 250294 128128 196200 238238 262298 251271 177193 185189  
110114 128132  
13 100104 340344 239247 222254 128132 196200 238242 234242 243251 177189 185189  
114114 116116  
13 100100 332332 235239 0 128128 188224 238238 0 251291 185193 177189 110118  
128128  
13 100100 332340 207227 0 128128 196216 238246 238262 235243 181189 169177  
110110 116128  
13 100116 348352 239247 238258 128128 192196 230246 238270 239247 189213 173201  
110110 128128  
13 104104 328340 211211 206246 128128 192216 234238 234250 247247 185197 177193  
118130 128128  
13 100104 344344 231235 0 128128 200208 238246 198286 243255 181193 169169  
114114 116128  
13 100104 320352 231231 182198 128132 188208 238238 238262 239259 189201 185193  
110114 116128  
13 100100 332340 211211 166314 128136 192212 238238 202238 251255 185193 185197  
110114 116116  
13 100100 328332 239243 202246 128132 188192 238274 262266 239251 189201 165201  
114114 128128  
13 100104 328352 235247 302326 128128 192196 238238 238250 235255 189193 181193  
114114 116128  
13 100104 340352 235243 206246 128128 192192 238238 254278 251255 181181 181197  
114118 128128  
13 104116 328360 211211 0 128136 196196 238238 206234 251251 193197 189201  
110118 116118  
13 098104 328344 211235 210270 128136 196196 238246 234266 251259 189189 193209  
114114 116128  
13 100100 340340 207211 170170 128128 188204 242246 234242 255267 185189 185185  
110118 128128  
13 100104 324336 227235 182186 128128 196196 242242 206270 251251 177185 173185  
114114 116128  
13 100104 348348 223239 202246 128128 192200 238238 206270 235263 177189 0  
114114 128128  
13 100100 336384 203243 210242 128128 188204 234238 202270 239247 181197 181185  
110110 116128



13 104116 332332 231243 178278 128128 200204 238246 258270 243255 177193 181181  
114114 116128  
13 100100 336376 239243 210250 128128 200212 238242 266270 231259 197205 177185  
114118 122128  
13 100100 340340 243247 0 128128 196232 238246 202258 255291 185209 173185  
110114 128128  
13 100100 254320 219243 198238 132136 192196 242246 198266 251255 189193 181193  
114114 116128  
13 104104 324340 235235 0 128136 188192 230242 274274 251263 177181 173181  
110118 128128  
13 100104 336336 211243 246286 128132 200208 238238 198270 251255 189217 173173  
110114 128128  
13 102116 340352 231235 206310 128128 192204 238238 198258 251259 185193 0  
114114 116128  
13 100100 340344 243243 246250 128128 192200 234250 234266 247255 201213 177189  
110110 128128  
13 100104 344344 239243 190198 128136 188196 238290 242258 251263 177185 197205  
114114 128128  
13 100104 324356 239247 206282 128128 192196 246246 266306 251251 189193 173181  
110114 116128  
13 100100 324348 231239 170178 128128 196200 238246 238282 255263 181189 177189  
110114 128128  
13 100104 340348 247255 186286 128128 188232 242250 198198 243247 177201 181209  
110114 116128  
13 100104 320340 211235 246282 128136 188252 238238 198242 243251 197213 193197  
114114 116128  
13 104104 328336 211243 254310 128128 192192 238238 258270 255267 197213 173193  
114114 116128  
13 104104 340344 211211 206250 128128 192236 238238 270282 247263 189193 0  
110114 116128  
13 100104 348356 227239 198278 128128 184204 230242 198278 235247 185201 157185  
114114 116116  
13 100108 340348 207211 246250 132132 192192 238238 258274 235251 197197 181185  
114114 116128  
13 100104 254348 211211 206242 128128 192200 238246 202202 239243 185201 177185  
114114 116116  
13 100100 340352 243243 210246 128128 192200 238242 246258 239255 177189 185189  
110118 128132  
13 100100 340344 207231 198250 128128 192192 238246 246262 247267 197201 165197  
110110 116128  
13 100104 344352 207231 246258 128128 192204 238242 258262 235239 201213 177189  
114114 128128  
13 100100 332356 235247 178226 128128 196216 242246 258270 239255 197213 177181  
110110 116128  
14 100100 336336 231243 202314 128128 204216 238262 202210 247259 205209 169181  
114114 116116

14 100100 316340 235247 174202 128128 204212 238238 198202 251275 205205 173173  
114114 116116  
14 100100 344348 235247 194302 128128 208216 238246 202206 247251 201205 169173  
114114 116116  
14 100100 328348 235239 178318 128128 192208 238242 194206 243243 197205 173185  
114114 116116  
14 100100 316324 243247 194314 128128 200212 238242 202206 247251 205217 169181  
114114 116116  
14 100100 348368 239251 202322 128128 204220 262262 202206 251251 205217 165169  
114118 116116  
14 100104 328348 235243 186190 128128 188196 234262 198206 239251 205217 173185  
114114 116116  
14 100100 336348 231235 178186 128128 220224 242262 202206 259267 205209 185185  
114114 116116  
14 100100 312336 247251 178314 128128 196228 234238 206206 251255 213217 169173  
114118 116128  
14 100100 336364 227247 174306 128128 208232 238242 202210 243263 201205 173185  
114114 116116  
14 100100 352360 239251 162282 128128 196228 238262 202302 243263 205205 181185  
114114 116116  
14 100106 324336 231235 170170 128128 204216 238238 206298 255259 205209 169169  
114114 116116  
14 100106 328336 239247 274278 128132 220232 238262 202210 259259 201209 169177  
114114 116116  
14 100100 340348 227251 178202 128128 196204 262262 202206 255271 193205 173177  
114114 116128  
14 100100 320324 247247 294310 128128 192224 238242 198210 235255 205209 169177  
114114 116116  
14 100100 324340 239247 318330 128128 204212 242254 206206 255259 205205 177185  
114114 116116  
14 100100 336352 235239 178302 128128 208228 226242 206298 235263 197205 173185  
114114 116128  
14 100100 328348 227235 190294 128128 204208 238254 202206 239267 205205 173193  
114114 116116  
14 100106 316348 243243 194330 128128 192220 238262 194202 251271 201209 173177  
114114 116128  
14 100104 332332 247255 178182 128128 204232 238238 198206 247259 209217 169189  
114114 116132  
14 100104 324332 235239 194194 128128 204204 254254 202202 239251 205209 169169  
114114 116116  
14 100106 308368 227251 182202 128128 192220 234238 206206 243263 205213 169185  
114114 116116  
14 100104 324336 239251 202314 128128 220232 238246 206206 243251 213217 169177  
114118 116116  
14 100106 308316 227255 162194 128128 200236 238262 194206 255263 209213 169181  
114114 116116

14 100106 344344 251255 194322 128128 224232 238238 202210 247247 189209 169173  
114114 116128  
14 100106 324340 243243 178310 128128 204216 238262 202206 243247 213213 181181  
114114 116116  
14 100100 308332 243247 178182 128132 232232 222262 202206 259267 205213 177197  
114114 116116  
14 100100 320324 231247 166178 128128 208208 238242 202298 239239 189205 169193  
114114 116116  
14 100106 312316 235239 170178 128128 220224 238238 194206 263263 213217 169173  
114114 116116  
14 100100 320364 235247 186186 128128 192232 238262 198202 251267 193205 169177  
114114 116128  
14 100100 324348 227251 178190 128132 196212 254262 202210 243251 213217 169201  
114114 116116  
14 100100 312332 243247 162294 128128 204220 238242 206210 239263 201205 173189  
114114 116116  
14 100104 332336 251251 310326 128128 204208 238238 206206 251263 209213 169173  
114114 116128  
14 100104 324360 243255 186314 128128 200204 238238 202206 243259 209213 177177  
114114 116116  
14 100100 336344 247255 178190 128132 192208 238254 206210 243251 205209 169185  
114114 116116  
14 100104 304348 235239 162170 128128 204212 234238 194194 259263 205205 173177  
114114 116116  
14 100100 300308 227235 186194 124128 208208 238250 206206 263271 213213 173173  
114114 116132  
14 100106 308352 235251 170314 128128 196200 238242 202202 255263 209213 169181  
114114 116132  
14 100106 324336 243247 178194 124128 200212 226262 194206 259259 205209 169169  
114114 116116  
14 100100 300332 227243 174198 124128 212216 238258 206206 271275 209209 169173  
114114 116116  
14 100100 304340 239239 162178 128128 192208 226238 206206 239259 185209 169173  
114114 116116  
14 100100 332340 239251 194314 128128 192228 238262 202202 251255 205209 173181  
114114 116116  
14 100100 332336 227235 178310 128128 204212 234254 202202 239243 193209 169177  
114114 116116  
14 100100 320340 227243 178186 128128 200204 238246 194202 255259 201209 173185  
114114 116116  
14 100100 344356 251251 178194 128128 204220 238258 206206 255263 209213 169173  
114114 116116  
14 0 324340 239251 170330 128128 208220 238242 206206 243267 205205 169185  
114114 116116  
14 100104 304340 227255 186202 128128 192224 238238 206206 251263 205209 165169  
114114 116128

14 100104 324336 235251 190202 128128 192232 238254 206206 243255 201217 169181  
114114 116122  
14 100104 316324 247255 178190 128128 196216 238242 194202 255263 189205 173173  
114114 128134  
14 100100 340344 243259 202302 128128 204220 238262 206206 247255 205209 177185  
114118 116116  
14 100100 340352 235247 0 128128 204228 234238 202206 251279 205209 165193  
114114 116116  
14 100106 308332 227231 182202 128128 204212 242266 206206 251263 205209 173193  
114114 116116  
14 100100 312316 235239 0 128128 196204 238254 206206 251259 201213 169173  
114114 116116  
14 100100 316324 227239 170314 128128 204212 238238 202206 259271 213213 181181  
114118 116116  
14 100100 340348 247251 186310 128128 200228 238238 202206 243267 201209 169189  
114114 116116  
14 100100 332332 243251 178182 128128 224232 226238 206210 247271 189193 173173  
114114 116116  
14 100100 300336 251259 206314 128128 216228 238262 202206 247251 197205 173181  
114118 116116  
14 100100 324344 243247 190202 128132 216232 242250 202206 247267 205233 173181  
114118 116128  
14 100106 324332 251255 0 128128 200228 238250 202202 239243 193201 173181  
114118 116116  
14 100106 336340 235243 0 128128 220228 238238 202206 255271 205213 169181  
114114 116116  
14 100100 300320 227255 190282 124128 216236 238242 202206 251255 213213 169173  
114114 116116  
14 100104 328332 227251 194194 124128 236236 242250 194210 239275 209209 165173  
114114 116116  
14 100104 316316 243243 170190 128128 220232 238238 206206 263267 209213 185185  
114118 116116  
14 100100 316348 247255 178194 128128 216228 238242 206206 263263 205209 177181  
114114 116116  
14 104106 332348 231235 186202 128128 204220 242254 202206 251251 205217 173177  
114114 116116  
14 100104 324340 239243 182310 128128 224224 230242 202206 251259 209217 181185  
114114 116116  
14 100100 320336 239243 178310 128128 192208 238246 202206 263275 201201 181185  
114114 116116  
14 100100 308348 227227 174310 128128 196224 238262 202206 251263 217225 169181  
114114 116116  
14 100100 300324 227235 182194 128128 204232 238238 206206 227247 205213 169177  
114114 116116  
14 100100 340340 227239 202314 128128 220224 246262 206210 223255 205205 173177  
114114 116116

14 100104 320340 243247 190206 128128 200216 238262 194206 247251 201205 169173  
114114 116128  
14 100100 324336 235247 162190 128128 204236 238238 206206 243247 205209 169169  
114114 116116  
14 100100 324332 235251 194206 128128 212236 238242 194298 247259 201213 173185  
114114 116116  
14 100104 328328 235251 162302 128128 216216 238262 206298 255263 209213 173193  
114114 116128  
14 100106 336340 239247 182302 128128 200208 238250 202202 263263 201205 169169  
114114 116116  
14 100104 340360 227247 186190 128128 192216 238254 202206 239251 209213 169173  
114114 116116  
14 100106 328356 247251 186202 128128 216228 230238 202206 251255 197205 173185  
114114 116128  
14 100104 316336 243247 194290 128128 216220 238238 206206 235251 205217 169173  
114114 116116  
14 100100 324324 235239 190310 128128 216220 254266 206206 243255 209213 169181  
114114 116116  
14 100100 308344 239243 190202 128128 212232 238238 210298 239271 209213 185197  
114114 116116  
14 100100 316336 235235 190202 128128 208220 238262 202206 251275 205209 169169  
114114 116116  
14 100104 328340 227235 170202 128128 224228 226262 206298 247263 209209 169197  
114114 116116  
14 100100 300340 239255 198314 128128 200212 238262 202202 251259 201205 169169  
114114 116116  
14 100100 308316 227251 170194 128128 192200 226266 206302 239267 205209 169185  
114114 116116  
14 106106 320336 227235 182194 128132 216228 238238 202206 239275 189205 181181  
114114 116116  
14 100106 316340 235239 194310 128128 196228 238242 198202 259259 205205 173185  
114114 116116  
14 100100 320360 227247 178314 128128 204228 230262 194210 235259 209209 169177  
114114 116116  
14 100106 324332 235247 190282 128128 208216 262266 206206 251251 201205 169193  
114118 116116  
14 100100 332332 243259 186202 128128 192204 230238 206206 247251 209213 169177  
114114 116116  
14 100100 324324 235239 194202 128132 204220 234262 202206 259259 205209 169185  
114114 116116  
14 100100 340340 227251 178298 128128 204212 234238 202202 247259 205209 185189  
114118 116116  
14 100104 316328 243251 186306 128128 204232 238262 202210 251259 213213 169169  
114114 116116  
14 100100 316340 235239 202310 128128 196216 238242 206210 239271 201225 169181  
114114 116116

14 100106 320324 235243 190306 128128 216220 254266 206206 239259 205209 169185  
114118 116116  
14 100100 324332 251259 170198 128128 208220 238262 202202 255259 205205 173181  
114114 116116  
15 100104 344368 231231 278294 128132 192192 246266 198206 227231 181201 177181  
114114 116128  
15 100104 344384 231231 306318 128128 192196 242266 202206 227255 189201 157193  
114114 116128  
15 104104 344356 207231 298298 128128 196208 234250 202278 239251 189193 157157  
114114 116128  
15 100104 336348 207235 258310 128128 184196 254258 206278 227283 189189 177201  
114114 116116  
15 100100 344344 231235 294318 128132 192208 246258 198306 223247 189193 193201  
114114 116128  
15 100104 344344 207231 262298 128132 192208 246246 202306 255283 189193 157193  
114114 116116  
15 104104 308344 235247 306318 128128 196196 250250 206206 231283 189193 157157  
114114 116116  
15 100104 340368 231259 318330 128132 196208 246266 206306 215283 197217 169193  
114114 116128  
15 100104 308344 231247 294306 128132 196196 250258 278306 239243 189209 193201  
114118 116128  
15 100104 368384 231235 318318 128132 196196 246250 198202 251255 189201 173193  
114114 116128  
15 100104 336348 207231 258330 124128 184224 246258 206306 251283 201205 157193  
114114 128128  
15 100100 266348 207259 302322 128128 188188 258262 206278 215251 193217 157169  
114118 116116  
15 100104 380384 231247 278294 128128 192196 246250 202306 239239 217217 193201  
114114 116128  
15 104104 352368 207211 278318 128132 196196 254258 198306 239239 189213 157157  
114114 116128  
15 100100 368372 231247 294322 128128 208208 250250 206306 239263 201217 193193  
114114 116128  
15 100104 368368 207211 302330 128128 188208 250262 278306 211263 189201 157173  
114114 116128  
15 100100 344372 231235 294318 128128 192208 246246 198306 247283 189193 193201  
114114 116128  
15 100100 266348 207231 254302 124128 188196 250258 202202 215251 193217 169181  
114118 116116  
15 100104 348352 207211 278294 128132 184196 246250 198202 231235 189205 157201  
114114 116116  
15 100100 308360 231231 302330 124128 192196 246250 206278 231283 189205 169193  
114114 116128  
15 104104 344348 231235 258306 128128 196196 242258 278306 215235 193213 161193  
114114 116116

15 100100 352368 207211 254278 128128 196208 254258 202202 255255 197201 181185  
114114 116116  
15 104104 308368 207231 254258 132132 208208 250250 202206 235243 189201 157185  
114118 116116  
15 100100 344352 231247 278294 128128 192192 250258 206306 239283 193213 157177  
114114 116128  
15 100100 348352 231259 258330 128132 192208 250250 198306 231239 197217 157173  
114114 116128  
15 100100 344344 231235 262298 128128 184192 246246 202306 247283 189189 193201  
114114 116128  
15 104104 348384 231231 298298 128128 192192 250266 202278 235239 201213 157193  
114114 116128  
15 104104 336344 207207 306318 128128 192196 246250 206278 255283 189217 157201  
114114 116128  
15 100100 344384 207231 278330 124128 192192 250250 198306 243283 201209 169181  
114114 116128  
15 100104 368384 207207 258318 128128 196196 242254 206270 243251 201201 177193  
114114 116128  
15 100104 348368 231247 254294 128128 196208 242246 206310 235263 189201 173181  
114114 116128  
15 100104 348360 231259 254298 128128 184208 250258 306306 211231 189201 185193  
114114 116128  
15 104104 344348 235239 318318 128128 196196 234250 198202 243251 189189 173193  
114114 116116  
15 100104 368384 211235 298326 128132 188208 246246 206306 255267 201201 157169  
114118 116128  
15 100104 344368 207259 278330 128132 196216 250266 202306 231255 189209 177185  
114114 116128  
15 100100 336368 207231 306318 128128 196196 246246 206306 251283 201217 169201  
114114 116116  
15 100104 368384 231247 278326 128128 192192 250254 206306 239243 193201 157157  
114114 116128  
15 100104 344360 211231 294298 128128 192208 250258 278278 239239 201217 157157  
114114 128128  
15 100104 344368 207235 310322 128128 196196 250258 206206 235263 177189 177193  
114118 116116  
15 100104 348352 231247 310318 128128 188192 250254 198206 227235 197201 161193  
114114 116116  
15 100104 328348 231247 298330 128128 208208 234258 202306 243247 197201 157157  
114114 128128  
15 100104 308356 231231 254298 132132 196208 246250 202202 243283 201205 173173  
114114 116116  
15 100100 344384 207231 274302 128128 192208 250266 270278 215239 181201 169193  
114114 116128  
15 100104 344352 211239 278306 128132 196196 250254 202202 235251 189201 173193  
114114 128128

15 104104 308344 207235 278298 128128 192196 246250 198278 239283 177201 157181  
114114 116116  
15 104104 344368 207211 294326 128132 192208 254258 202206 235235 201217 157181  
114114 116128  
15 100104 368368 211259 254326 128128 184196 250258 206206 243255 189193 157157  
114114 116128  
15 100104 308356 231235 294298 124132 192196 246250 198202 243283 189209 193201  
114114 116128  
15 100100 348348 231235 258318 128132 184208 234258 278278 247263 193201 157177  
114118 116116  
15 100104 328348 207207 258298 128132 196200 250262 202202 255283 193201 169193  
114118 116128  
15 104104 328344 231251 254318 128128 196208 250258 278306 231239 193221 157181  
114114 116116  
15 100104 308348 231231 258330 124128 196224 246258 206306 251283 189201 157193  
114114 128128  
15 100104 368372 231247 318330 128128 208208 250250 198306 239263 189217 157193  
114114 128128  
15 100100 336384 207207 310318 128128 192196 250258 206278 243255 189201 157193  
114114 116128  
15 104104 266344 207231 254306 128128 188208 258258 202270 235247 189217 193201  
114114 116116  
15 100104 344348 231251 294298 128132 192196 242250 198306 239247 201209 157157  
114114 116116  
15 100100 336384 207231 298330 128128 196196 246246 206306 251283 201217 157169  
114114 116116  
15 100104 368368 231247 294318 128128 196208 242266 198306 211235 189217 193193  
114118 128128  
15 100104 344368 231259 306310 128128 200224 234250 198278 263279 197201 181181  
114114 116128  
15 100104 360384 211231 310326 128128 196208 246258 206306 215227 201201 157157  
114118 128128  
15 100104 344368 211211 294294 128132 196208 246250 206278 227247 201213 157193  
114114 128128  
15 104104 328360 207211 278318 128128 192196 234250 198202 243267 201217 157181  
114114 128128  
15 100104 344384 207231 306322 128128 192208 250262 206270 247251 189201 169201  
114114 116128  
15 100104 348352 207231 258318 128128 184196 246250 198278 259283 189205 193201  
114114 116128  
15 100104 344344 235235 278278 128128 184196 234246 198202 235247 193201 157193  
114114 116116  
15 100100 344344 207231 262298 128132 192208 246262 202306 255283 189193 193201  
114114 116116  
15 100104 348352 247259 258330 128128 196208 250254 206306 239243 189205 181185  
114114 128128



15 100104 336352 235247 318322 128128 192216 246250 202278 239255 201217 169181  
114114 116116  
15 100104 344368 247259 302310 128132 208208 246254 198278 263279 193201 157181  
114114 116128  
15 100100 308348 231231 254330 124128 196216 246250 202306 239247 189201 157185  
114114 128128  
15 104104 336392 231231 298298 124128 188192 238246 202206 263267 189201 157181  
114114 116116  
15 100104 360384 231247 254294 128128 192208 242258 198202 227247 193201 157181  
114114 116128  
15 104104 308352 231247 298318 128128 196196 246258 198206 239239 201217 157193  
114114 116128  
15 100104 344368 231247 294302 128128 196208 234242 278306 255283 189201 173181  
114114 116116  
15 104104 344368 231235 0 128128 192196 246258 198202 235243 189201 157157  
114114 116116  
15 100104 344344 231259 278330 128132 196216 250266 202306 231255 189209 177177  
114114 116128  
15 100104 344368 207251 254330 132132 208216 250266 202242 235235 189217 157193  
114114 116128  
15 100100 348368 211231 294330 128128 192208 242254 206206 231235 201217 181181  
114114 128128  
15 100104 308372 247259 254318 128132 196196 250258 198202 227239 201217 181193  
114114 128128  
15 100104 308344 231247 258298 128128 196196 242250 198306 243263 193201 181185  
114114 116128  
15 104104 352384 211247 302318 128128 196196 246258 198242 239247 189213 157181  
114114 116116  
15 100104 368372 231247 294318 128128 196208 242266 206306 211263 201201 157193  
114118 128128  
15 100104 352368 211211 298318 128132 188208 246250 206206 215215 193201 157169  
114118 116128  
15 104104 308352 231247 310322 128132 184196 246258 202206 251263 201217 157193  
114114 116128  
15 104104 356384 231231 278326 128128 196208 234250 202278 235239 193201 157157  
114114 128128  
15 100100 328368 211251 254298 128128 196208 234250 202206 227263 201217 169193  
114114 128128  
15 104104 344384 207211 306310 128128 196208 246250 198306 231251 193201 157193  
114114 116128  
15 100104 348352 207207 306310 124128 192208 230262 198306 231251 201217 157157  
114114 128128  
15 100100 344368 207247 310310 128128 192196 258262 198206 235263 201213 181193  
114114 116128  
15 100104 344352 207207 254330 124128 192208 234258 198310 283283 189217 193193  
114114 116128

15 104104 352384 207211 294302 128132 196196 254258 198242 239247 189213 157157  
114114 116128  
15 104104 344384 207211 254306 128132 196208 242250 202206 231231 201217 193193  
114114 128128  
15 100104 344348 231231 254298 128128 196196 246250 202278 235239 201201 157181  
114114 116128  
15 100104 308352 211231 310318 128128 188192 250254 206306 239247 197201 169193  
114114 116116  
15 100104 336360 231231 318330 128128 192196 246250 202278 227283 201201 193193  
114114 116116
