# Supplementary material
Source: publisher figshare collection journal article supplement (https://tandf.figshare.com/articles/dataset/_/5439787)
Supplement: Supplementary file 2 [file 1]

## Supplement B: Summary of Genetic Diversity Estimates for Sockeye Salmon

Supplementary Table S.B.2. A summary of genetic diversity estimates for 13 microsatellite loci in Sockeye Salmon from 12 locations (S1–S12) within or near the Katmai National Park and Preserve and in kokanee from Dakavak, Devil’s Cove, and Jo-Jo lakes. The estimates include expected heterozygosity ( $H_e$ ), observed heterozygosity ( $H_o$ ), and allelic richness ( $A_r$ ). Estimates of  $H_o$  that were judged significantly lower than  $H_e$  after correcting  $\alpha$  (0.05) for multiple tests are in bold italics. The sample size obtained from each aggregation is shown in parentheses.

| Location <sup>a</sup> | Statistic | Omy77 | One100       | One102 | One103 | One105 | One108 | One110 | One111 | One114 | One115 | Ots103 | Ots107 | uSat60 | Average |
|-----------------------|-----------|-------|--------------|--------|--------|--------|--------|--------|--------|--------|--------|--------|--------|--------|---------|
| S1 (64)               | $A_r$     | 3.00  | 15.10        | 7.96   | 18.20  | 3.49   | 8.90   | 9.25   | 15.17  | 13.41  | 10.93  | 12.63  | 3.49   | 2.86   | 9.57    |
|                       | $H_e$     | 0.557 | 0.867        | 0.678  | 0.908  | 0.363  | 0.834  | 0.851  | 0.847  | 0.865  | 0.816  | 0.880  | 0.148  | 0.454  | 0.698   |
|                       | $H_o$     | 0.547 | 0.922        | 0.812  | 0.921  | 0.422  | 0.812  | 0.953  | 0.891  | 0.875  | 0.781  | 0.906  | 0.156  | 0.469  | 0.728   |
| S2 (60)               | $A_r$     | 4.96  | 16.22        | 13.06  | 18.03  | 3.67   | 13.92  | 13.08  | 17.98  | 15.41  | 13.79  | 13.62  | 4.45   | 5.19   | 11.80   |
|                       | $H_e$     | 0.601 | 0.883        | 0.893  | 0.922  | 0.367  | 0.902  | 0.893  | 0.895  | 0.917  | 0.910  | 0.908  | 0.358  | 0.539  | 0.768   |
|                       | $H_o$     | 0.633 | 0.867        | 0.833  | 0.906  | 0.417  | 0.883  | 0.867  | 0.881  | 0.917  | 0.933  | 0.867  | 0.333  | 0.500  | 0.757   |
| S3 (81)               | $A_r$     | 4.71  | 22.65        | 13.16  | 20.68  | 3.97   | 11.80  | 13.37  | 18.68  | 17.40  | 16.48  | 15.75  | 4.24   | 4.62   | 12.88   |
|                       | $H_e$     | 0.591 | 0.936        | 0.881  | 0.933  | 0.236  | 0.901  | 0.898  | 0.900  | 0.939  | 0.922  | 0.917  | 0.236  | 0.571  | 0.759   |
|                       | $H_o$     | 0.593 | 0.926        | 0.901  | 0.951  | 0.210  | 0.951  | 0.877  | 0.889  | 0.938  | 0.914  | 0.901  | 0.235  | 0.593  | 0.760   |
| S4 (60)               | $A_r$     | 4.62  | 18.57        | 9.49   | 19.69  | 2.99   | 13.10  | 12.87  | 14.09  | 16.27  | 15.14  | 15.00  | 3.66   | 4.22   | 11.52   |
|                       | $H_e$     | 0.567 | 0.917        | 0.810  | 0.916  | 0.172  | 0.878  | 0.862  | 0.893  | 0.919  | 0.920  | 0.899  | 0.229  | 0.475  | 0.727   |
|                       | $H_o$     | 0.583 | <b>0.690</b> | 0.800  | 0.893  | 0.183  | 0.850  | 0.933  | 0.883  | 0.915  | 0.850  | 0.883  | 0.250  | 0.433  | 0.704   |
| S5 (96)               | $A_r$     | 4.33  | 19.42        | 13.48  | 23.33  | 3.77   | 13.51  | 14.12  | 21.83  | 20.41  | 15.44  | 14.26  | 5.61   | 5.49   | 13.46   |
|                       | $H_e$     | 0.494 | 0.927        | 0.833  | 0.953  | 0.235  | 0.903  | 0.896  | 0.913  | 0.944  | 0.919  | 0.906  | 0.337  | 0.551  | 0.755   |
|                       | $H_o$     | 0.49  | 0.885        | 0.760  | 0.896  | 0.240  | 0.927  | 0.875  | 0.937  | 0.958  | 0.906  | 0.948  | 0.375  | 0.490  | 0.745   |
| S6 (60)               | $A_r$     | 7.08  | 17.07        | 12.88  | 25.83  | 2.99   | 14.08  | 11.66  | 20.80  | 18.76  | 16.07  | 15.94  | 5.34   | 5.86   | 13.41   |
|                       | $H_e$     | 0.612 | 0.922        | 0.886  | 0.960  | 0.320  | 0.905  | 0.895  | 0.879  | 0.936  | 0.928  | 0.906  | 0.203  | 0.554  | 0.762   |
|                       | $H_o$     | 0.567 | <b>0.667</b> | 0.917  | 0.949  | 0.362  | 0.850  | 0.926  | 0.793  | 0.850  | 0.917  | 0.933  | 0.183  | 0.550  | 0.728   |
| S7 (75)               | $A_r$     | 5.87  | 27.14        | 12.42  | 24.23  | 3.53   | 12.83  | 14.45  | 20.17  | 18.48  | 15.15  | 16.83  | 6.03   | 4.34   | 13.96   |



| Location <sup>a</sup> | Statistic            | <i>Omy77</i> | <i>One100</i> | <i>One102</i> | <i>One103</i> | <i>One105</i> | <i>One108</i> | <i>One110</i> | <i>One111</i> | <i>One114</i> | <i>One115</i> | <i>Ots103</i> | <i>Ots107</i> | <i>uSat60</i> | Average |
|-----------------------|----------------------|--------------|---------------|---------------|---------------|---------------|---------------|---------------|---------------|---------------|---------------|---------------|---------------|---------------|---------|
| S8 (86)               | <i>H<sub>e</sub></i> | 0.556        | 0.949         | 0.855         | 0.950         | 0.304         | 0.896         | 0.881         | 0.879         | 0.940         | 0.915         | 0.926         | 0.339         | 0.542         | 0.764   |
|                       | <i>H<sub>o</sub></i> | 0.573        | 0.932         | 0.867         | 0.929         | 0.333         | 0.867         | 0.907         | 0.840         | 0.932         | 0.919         | 0.880         | 0.347         | 0.547         | 0.759   |
|                       | <i>A<sub>r</sub></i> | 3.42         | 11.10         | 8.47          | 18.77         | 2.00          | 7.98          | 8.71          | 12.87         | 13.51         | 11.57         | 10.60         | 3.72          | 4.42          | 9.01    |
|                       | <i>H<sub>e</sub></i> | 0.448        | 0.779         | 0.745         | 0.915         | 0.433         | 0.842         | 0.853         | 0.890         | 0.869         | 0.857         | 0.844         | 0.355         | 0.435         | 0.713   |
| S9 (62)               | <i>H<sub>o</sub></i> | 0.488        | 0.767         | 0.640         | 0.904         | 0.442         | 0.872         | 0.802         | 0.941         | 0.930         | 0.849         | 0.895         | 0.372         | 0.442         | 0.719   |
|                       | <i>A<sub>r</sub></i> | 6.08         | 19.77         | 10.56         | 22.42         | 5.27          | 12.61         | 14.28         | 17.64         | 16.07         | 15.04         | 12.12         | 4.29          | 5.17          | 12.41   |
|                       | <i>H<sub>e</sub></i> | 0.572        | 0.906         | 0.834         | 0.937         | 0.421         | 0.897         | 0.893         | 0.886         | 0.914         | 0.893         | 0.878         | 0.249         | 0.554         | 0.756   |
|                       | <i>H<sub>o</sub></i> | 0.629        | 0.823         | 0.839         | 0.918         | 0.435         | 0.919         | 0.918         | 0.903         | 0.952         | 0.984         | 0.887         | 0.258         | 0.532         | 0.769   |
| S10 (86)              | <i>A<sub>r</sub></i> | 5.69         | 15.79         | 9.67          | 16.28         | 2.47          | 10.94         | 11.69         | 16.75         | 14.39         | 12.54         | 14.73         | 3.00          | 3.00          | 10.53   |
|                       | <i>H<sub>e</sub></i> | 0.671        | 0.879         | 0.811         | 0.899         | 0.428         | 0.806         | 0.881         | 0.873         | 0.920         | 0.873         | 0.898         | 0.343         | 0.523         | 0.754   |
|                       | <i>H<sub>o</sub></i> | 0.598        | 0.908         | 0.793         | 0.897         | 0.322         | 0.805         | 0.943         | 0.885         | 0.977         | 0.782         | 0.895         | 0.368         | 0.552         | 0.748   |
|                       | <i>A<sub>r</sub></i> | 6.63         | 16.20         | 13.03         | 30.60         | 5.64          | 15.45         | 13.90         | 22.52         | 15.58         | 12.26         | 15.10         | 5.63          | 3.46          | 13.54   |
| S11 (56)              | <i>H<sub>e</sub></i> | 0.727        | 0.916         | 0.882         | 0.964         | 0.566         | 0.888         | 0.873         | 0.917         | 0.924         | 0.867         | 0.901         | 0.348         | 0.506         | 0.791   |
|                       | <i>H<sub>o</sub></i> | 0.786        | 0.946         | 0.857         | 0.964         | 0.618         | 0.929         | 0.786         | 0.964         | 0.929         | 0.857         | 0.875         | 0.268         | 0.491         | 0.790   |
|                       | <i>A<sub>r</sub></i> | 8.81         | 15.76         | 13.80         | 19.80         | 3.95          | 11.85         | 12.95         | 19.00         | 17.76         | 12.95         | 14.94         | 3.95          | 3.00          | 12.19   |
|                       | <i>H<sub>e</sub></i> | 0.608        | 0.887         | 0.816         | 0.936         | 0.331         | 0.877         | 0.896         | 0.879         | 0.913         | 0.887         | 0.889         | 0.323         | 0.482         | 0.748   |
| DAK (96)              | <i>H<sub>o</sub></i> | 0.524        | 0.881         | 0.762         | 0.857         | 0.333         | 0.905         | 0.881         | 0.95          | 0.929         | 0.881         | 0.952         | 0.381         | 0.548         | 0.753   |
|                       | <i>A<sub>r</sub></i> | 5.77         | 15.27         | 10.96         | 30.90         | 3.00          | 11.49         | 9.69          | 18.47         | 14.88         | 12.20         | 12.93         | 4.08          | 4.04          | 11.82   |
|                       | <i>H<sub>e</sub></i> | 0.602        | 0.899         | 0.865         | 0.954         | 0.293         | 0.848         | 0.678         | 0.925         | 0.869         | 0.89          | 0.889         | 0.55          | 0.475         | 0.749   |
|                       | <i>H<sub>o</sub></i> | 0.594        | 0.857         | 0.854         | 0.965         | 0.292         | 0.896         | 0.677         | 0.926         | 0.844         | 0.948         | 0.871         | 0.479         | 0.469         | 0.744   |
| DEV (95)              | <i>A<sub>r</sub></i> | 3.00         | 16.42         | 8.85          | 20.80         | 2.92          | 12.38         | 10.74         | 6.61          | 12.11         | 9.27          | 8.97          | 2.00          | 3.65          | 9.06    |
|                       | <i>H<sub>e</sub></i> | 0.367        | 0.916         | 0.866         | 0.93          | 0.121         | 0.91          | 0.739         | 0.676         | 0.891         | 0.791         | 0.805         | 0.119         | 0.176         | 0.639   |
|                       | <i>H<sub>o</sub></i> | 0.404        | 0.884         | 0.905         | 0.956         | 0.126         | 0.926         | 0.789         | 0.642         | 0.863         | 0.8           | 0.811         | 0.126         | 0.179         | 0.647   |
|                       | <i>A<sub>r</sub></i> | 2.00         | 12.81         | 7.55          | 13.16         | 3.00          | 7.41          | 8.82          | 7.37          | 14.19         | 9.65          | 8.63          | 2.00          | 2.00          | 7.58    |
| JOJ (95)              | <i>H<sub>e</sub></i> | 0.502        | 0.870         | 0.782         | 0.909         | 0.364         | 0.743         | 0.808         | 0.816         | 0.913         | 0.793         | 0.801         | 0.119         | 0.497         | 0.686   |
|                       | <i>H<sub>o</sub></i> | 0.547        | 0.895         | 0.789         | 0.915         | 0.368         | 0.705         | 0.863         | 0.863         | 0.895         | 0.895         | 0.768         | 0.126         | 0.495         | 0.702   |

<sup>a</sup> Collection codes: for Sockeye Salmon, S1 = Charlene Creek; S2 = Dumpling Creek 1, S3 = Dumpling Creek 3, S4 = East La Gorce Creek, S5 = Hammersly Lake, S6 = Idavain Creek, S7 = Katolinat Creek 4, S8 = Lower Q-Tip Lake, S9 = North La Gorce Creek, S10 = Swikshak River, S11 = Karluk River, and S12 = Surprise Lake; for kokanee, DAK = Dakavak Lake, DEV = Devil's Cove Lake, and JOJ = Jo-Jo Lake.
